# Supplementary material for: ATR addiction in multiple myeloma: synthetic lethal approaches exploiting established therapies
Source: PubMed Central journal article supplement — Haematologica. 2019 Nov 14;105(10):2448–56. doi: 10.3324/haematol.2018.215210 (PMC7556682; doi:10.3324/haematol.2018.215210), 2019-11-14
Supplement: 2018.215210.BOTRUGNO_SUPPL.pdf [file 2018.215210.BOTRUGNO_SUPPL.pdf]

## ATR addiction in multiple myeloma: synthetic lethal approaches exploiting established therapies

Oronza A. Botrugno,<sup>1</sup> Silvia Bianchessi,<sup>2</sup> Desirée Zambroni,<sup>3</sup> Michela Frenquelli,<sup>1</sup> Daniela Belloni,<sup>4</sup> Lucia Bongiovanni,<sup>5</sup> Stefania Girlanda,<sup>6</sup> Simona Di Terlizzi,<sup>7</sup> Marina Ferrarini,<sup>4</sup> Elisabetta Ferrero,<sup>4</sup> Maurizio Ponzoni,<sup>5</sup> Magda Marcatti<sup>6</sup> and Giovanni Tonon<sup>1,8</sup>

<sup>1</sup>Functional Genomics of Cancer Unit, Experimental Oncology Division, IRCCS San Raffaele Scientific Institute; <sup>2</sup>Laboratory of Lymphoid Organ Development, Division of Experimental Oncology, IRCCS San Raffaele Scientific Institute; <sup>3</sup>ALEMBIC, Advanced Light and Electron Microscopy Bio-Imaging Center, IRCCS San Raffaele Scientific Institute; <sup>4</sup>B-Cell Neoplasia Unit, Division of Experimental Oncology, IRCCS San Raffaele Scientific Institute; <sup>5</sup>Pathology Unit, IRCCS San Raffaele Scientific Institute; <sup>6</sup>Hematology and Bone Marrow Transplantation Unit, IRCCS San Raffaele Hospital; <sup>7</sup>FRACTAL, Flow Cytometry Resource Advanced Cytometry Technical Applications Laboratory, IRCCS San Raffaele Scientific Institute and <sup>8</sup>Center for Omics Sciences, IRCCS San Raffaele Scientific Institute, Milan, Italy

©2020 Ferrata Storti Foundation. This is an open-access paper. doi:10.3324/haematol.2018.215210

Received: January 7, 2019.

Accepted: November 13, 2019.

Pre-published: November 14, 2019.

Correspondence: GIOVANNI TONON - tonon.giovanni@hsr.it

---

## Supplemental Methods

### Cell culture and reagents

MM cell lines MM1.S, H929, KMS20, RPMI 8226, LP1, OPM2, U266, and KMS34 were kindly provided by researchers or purchased from American Type Culture Collection (ATCC). All cell lines were cultured in RPMI 1640 medium (Euroclone, Pero, Italy) supplemented with 10% heat-inactivated Fetal Bovine Serum (FBS, Euroclone), 2 mM of L-glutamine and 1% of penicillin and streptomycin antibiotics (Euroclone). HeLa, U2OS and HEK923T cells were purchased from ATCC and grown in DMEM (Euroclone) supplemented as above. Cultures were maintained in a humidified tissue culture incubator at 37°C in 5% CO<sub>2</sub> for no more than 4 weeks after thawing. Cell lines were authenticated by STR analysis (Cell ID™ System, Promega, Madison, WI, USA) and routinely tested for the presence of mycoplasma contamination.

MM1.S-Luc and U266-Luc cells stably expressing luciferase were generated by transduction with a 3<sup>rd</sup> generation lentiviral vector carrying the luciferase gene. pLenti PGK V5-LUC Neo (w623-2) was a gift from Eric Campeau (Addgene plasmid # 21471).

Constitutive knockdown of CDC25A expression was achieved by cloning short hairpin sequences targeting human CDC25A into the lentiviral vector pLKO.1. The gene-specific constructs derive from the RNAi Consortium (TRC) shRNA Library (<https://portals.broadinstitute.org/gpp/public/>), while the non-mammalian shRNA control plasmid was purchased from Sigma-Aldrich (St. Louis, MO, USA). The shRNAs sequences were as follow:

CTRL (non-targeting): CAACAAGATGAAGAGCACCAA

sh#704: CCCGTCGTGAAGGCGCTATTT

sh#112: ACAACCGATGCAAGCTGTTTG

Lentiviral production and cell infection were performed as already published.<sup>1,2</sup>

Primary MM cells were collected from Bone Marrow (BM) aspirates through positive selection with anti-CD138 coated magnetic nanoparticles (Robosep, Stemcell Technologies, Vancouver Canada) as in <sup>3</sup>. Bone Marrow (BM) Stromal Cells (BMSCs) were obtained by culturing CD138-negative mononuclear cells in DMEM medium with FBS, antibiotics and 2mM L-glutamine. Samples from patients were obtained upon written informed consent. This study was carried out in accordance with protocols approved by the Institutional Review Board, and the procedures followed were in accordance with the Declaration of Helsinki of 1975, as revised in 2000.

The ATM inhibitor KU-55933 and the ATR inhibitors VX-970, VE-821 and AZD6738 were purchased from Selleckchem (Houston, TX, USA) and dissolved in DMSO. Hydroxyurea was from Sigma-Aldrich, doxorubicin and melphalan were obtained from San Raffaele Hospital and dissolved in PBS.

### **Compounds treatment, proliferation and apoptosis assays**

Cells were seeded in 96-well flat bottom white plates at the density of 5,000 cells per well in 50 µl medium and left at room temperature for 30 min before incubating at 37°C for 24 h. Compounds were serially diluted in DMSO or PBS and further diluted to 2x final concentration in medium before adding 50 µl compound to the cells. Final DMSO concentration was 0.1%. Treatments were performed in technical triplicates. Cells were incubated with

the compounds at 37°C for 72 h with no further changes of media or compounds refresh. Cell viability was measured with CellTiter-Glo (Promega) according to manufacturer's instructions. Briefly, plates were allowed to equilibrate at room temperature for 20 min, and an equal volume of CellTiter-Glo reagent was added directly to the wells. Plates were incubated at room temperature for 30 min on a shaker and luminescence was measured on a Mithras LB 940 microplate reader (Berthold Technologies, Bad Wildbad, Germany). Luminescence reading was expressed as percentage relative to the DMSO or PBS-treated control cells. Unless otherwise specified, experiments were repeated at least 3 times. The experimental data (percentage of viable cells compared to control) were analyzed independently using the Combenefit software, a tool enabling the visualization, analysis and quantification of drug combination effects.<sup>4</sup> For each combination experiment, we applied the most widely used effect-based methodology (Bliss independence model), and dose-effect-based strategy (Loewe additivity).<sup>5</sup> The degree of interactions was visualized as a colour scale ranging from blue (synergy) to red (antagonism). Only combinations giving consistent results with both models were taken into consideration.<sup>5,6</sup> A combination giving a synergy score value lower than -10 was considered to be antagonistic, from -10 to 10, additive, larger than 10 synergistic.

For apoptosis determination, cells were stained with fluorescein isothiocyanate (FITC)-labeled Annexin V and Propidium Iodide (PI) using a FITC AnnexinV Apoptosis detection kit (BD Pharmingen, San Diego, CA, USA) according to the manufacturer's instructions. Annexin V and PI positive

cells were quantified using a Cytoflex S Flow Cytometer (Beckman Coulter, Brea, CA) and FCS Express 6 Flow Cytometry Software (De Novo Software Glendale, CA)

### **Immunoblots and antibodies**

Whole-cell extracts were obtained by lysis in sodium dodecyl sulfate (SDS) buffer (50 mM of Tris HCl pH 6.8, 10% glycerol, 2% SDS). Proteins were separated by SDS-polyacrylamide gel electrophoresis, blotted onto an Immobilon-P Polyvinylidene difluoride membrane (Merck KGaA, Darmstadt, Germany), and probed with the indicated antibodies. ECL Detection System (GE Healthcare, Hercules, CA, USA) and Clarity Western ECL Blotting Substrate (Bio-Rad, Hercules, CA, USA) were used for the chemiluminescent reaction.

The antibodies used were as follow: phospho RPA 32 (S4/S8) (A300-245A), phospho RAD17 (S645) (A300-153A), RAD17 (A305-788A) from Bethyl (Montgomery, TX, USA); phospho CHK1 (S345) (#2348), phospho CHK2 (T68) (#2197), CHK1 (#2360), CHK2 (#2662), phospho P53 (S15) (#9284), PARP (#9542) and cleaved Caspase-3 (#9661) from Cell Signaling (Leiden, The Netherlands); RPA32/RPA2 (ab2175) from Abcam (Cambridge, UK); P53 (DO-1) (sc-126) from Santa Cruz (Dallas, TX, USA); anti-GAPDH (GTX627408) from GeneTex (Irvine, CA, USA); anti-Vinculin (V9131) from Sigma-Aldrich; HRP-conjugated anti-mouse and anti-rabbit secondary antibodies from GE Healthcare.

### **Imaging flow cytometry**

Cells were fixed with 1% Paraformaldehyde (Sigma-Aldrich), washed with PBS containing 2% FBS, permeabilized for 20min with 1x Permeabilization Buffer (ThermoFisher, Waltham, MA), then sequentially incubated with  $\gamma$ H2AX (clone 2F3) from BioLegend (San Diego, California) at a dilution of 1:500 and a secondary antibody AlexaFluor-647 (A-31571, ThermoFisher) at a dilution of 1:1000, each for 1 h at 4°C. Incubation for 5 min with 5  $\mu$ g/ml DAPI (ThermoFisher), preceded a final set of washes with PBS containing 2 mM EDTA.

$\gamma$ H2AX intensity was analysed by imaging flow cytometry using ImageStreamX MarkII System (Amnis, Merck). The instrument is equipped with 3 lasers (405nm, 488nm and 642nm), 6-channels CCD camera, Multimag option but no EDF (Extended Depth of Field) element. Excitation laser settings were 405 nm (9 mW) and 642 nm (90 mW). At least 30,000 events were collected for each sample with the 60X\_0.9NA objective, at low speed, and the images were analyzed using IDEAS 6.2 software. Single-stained samples were acquired with the identical laser settings of the samples and used for compensation. First, cells were gated for cells in-focus using the gradient root mean square feature (RMS) and then single cells were identified using area and aspect ratio features on the brightfield image. DAPI positive cells were gated for intensity of DAPI channel (Ch01) and intensity of side scattering (Ch06), and healthy cells were then further gated for intensity and max pixel intensity of side scattering (Ch06). The intensity of  $\gamma$ H2AX staining was quantified in the nuclear region. For the identification of  $\gamma$ H2AX foci a first spot

mask was used to select the spots with a size  $\geq 2$  pixels and a spot to cell background ratio  $\geq 10$ . A threshold feature of 70% was then applied and a further peak function with spot to cell background ratio of 10 was then used to extract foci from the background. As a final step the  $\gamma$ H2AX foci mask was combined with the nuclear mask in order to ensure that the foci identified were inside the nucleus. Spot Count feature was finally used to count the number of foci per cell.

### **RNA extraction, reverse transcription and Real Time PCR**

Total RNA was isolated using RNeasy Plus Mini Kit (Qiagen, Hilden, DE) according to the manufacturer's instructions. cDNA was synthesized with random primers using the Promega Reverse Transcription System (Promega). Quantitative Real Time PCR was performed using SYBR Green Mastermix (Thermofisher) in combination with specific primer pairs on the ViiA™7 Real Time PCR System (Thermofisher). Primer pairs were as follow:

TBP forward GCTGGCCCATAGTGATCTTT

TBP reverse CTTCACACGCCAAGAAACAGT

CDC25A forward TCTGAAGAATGAGGAGGAGACC

CDC25A reverse AACAGCTTGCATCGGTTGT.

### **Mice, bioluminescent imaging and pharmacological treatments**

All mice were housed and bred in the institutional pathogen-free animal facility, treated in accordance with the European Union guidelines and with the approval of the San Raffaele Scientific Institute Institutional Ethical Committee. Rag2<sup>-/-</sup> $\gamma$ c<sup>-/-</sup> mice on BALB/c background were kindly provided by CIEA (Central Institute for Experimental Animals, Kawasaki, Japan) and

Taconic (Rensselaer, NY, USA).

Eight to ten-week-old Rag2<sup>-/-</sup>γc<sup>-/-</sup> mice were injected intravenously with 5 x 10<sup>6</sup> luciferase expressing cells in 200 μl of PBS. Mice were monitored for myeloma progression by bioluminescent imaging (BLI) using the IVIS SpectrumCT System (Perkin Elmer, USA). The system is composed of a low noise, back-thinned, back-illuminated CCD camera cooled at -90°C with a quantum efficiency in the visible range above 85%. Each mouse received an intra-peritoneal injection of 150 mg luciferin/kg body weight 10 min before BLI. During image acquisition, the animals were kept at 37°C and under gaseous anesthesia (2–3% isoflurane and 1 l/min oxygen). Dynamic BLI was performed by acquiring a set of images every 2 min from 10 to 20 min after luciferin injection to detect the highest BLI signal. The images were obtained using the following IVIS settings: exposure time=auto, binning=8, f=1 and a field of view equal to 22 cm (field D). No emission filters were used during BLI acquisitions. BLI image analysis was performed by placing Region of Interests (ROI) and by measuring the total flux (photons/seconds) within the ROI. Images were acquired and analyzed using Living Image 4.5 (Perkin Elmer).

Treatment commenced when the tumour burden became detectable, 4 and 8 weeks after inoculation for mice injected with MM1S-Luc and U266-Luc cells, respectively. Mice were assigned into 4 treatment groups of 5 animals each: VX-970, melphalan, VX-970/melphalan and vehicle. Treatment cycles consisted of 5 days of treatment followed by 2 days rest. A total of 3 treatment cycles were given. VX-970, 60 mg/kg in a solution in 10% Vitamin E Tocopheryl Polyethylene Glycol Succinate (VitE TPGS, Sigma-Aldrich), was



administered by oral gavage once a day continuously for 5 days. Melphalan (2 mg/kg in PBS) was administered by intraperitoneal injection once a day on day 1, 3 and 5 of each treatment cycle. The control group was treated with vehicle (10% VitE TPGS in water) and PBS. Body weight was assessed twice a week. Mice were imaged at day 5 of each treatment cycle and one week after the end of the treatment in order to assess tumour burden during and post-therapy. Mice were euthanized by CO<sub>2</sub> inhalation when they became detectably ill and developed hind limb paralysis.

### **Immunohistochemistry on human BM biopsies**

4 µm thick sections were obtained from Bouin-fixed, paraffin-embedded tissue blocks of bone marrow biopsies of untreated patients with a diagnosis of MM. The antibodies used were as follow: γH2AX (clone 2F3) from BioLegend (San Diego, CA, USA) at a dilution of 1:200 and phospho CHK1 (S317) (A304-673A) from Bethyl at a dilution of 1:200. Sections underwent antigen retrieval with CC1 solution (Roche). For both antibodies immunohistochemistry was performed with an automated immunostainer (Ventana Benchmark Ultra; Tucson, Arizona), according to the manufacturer's instructions; Optiview Universal DAB detection kit (Roche) was used for detection. The expression of γH2AX and phospho Chk1 was evaluated as nuclear staining in positive cells and reported as mean percentage compared to the total amount neoplastic cells. A Zeiss Axioskope 40 microscope was used for slide evaluation and microphotographs were taken with a Zeiss MRc Axiocam (Zeiss GmbH, Germany).

### **3D culture and response to drugs of human primary MM cells**

3D dynamic culture was performed using the RCCS™ bioreactor RCCS-1 (Synthecon Inc., Houston TX, USA), as in <sup>3</sup>. Scaffold discs were cut from Spongostan gelatin sheets (Ethicon Inc., Somerville NJ, USA), pre-seeded with BMSC (100,000/scaffold) and then seeded with MM cells (200,000/scaffold) isolated from BM biopsies. Resulting constructs were kept in parallel cultures in the bioreactor (2 constructs/vessels) and treated with either VX-970 (0.3 μM) or melphalan (1.2 μM) or a combination of both for 72 h. At the end of the culture period, cells were recovered from scaffolds by means of liberase (25 mg/ml, (Roche Diagnostic, Mannheim, Germany) and stained with PC7-conjugated anti-CD38 (#560677) and FITC-conjugated Annexin V (#556547), both from BD Pharmingen (San Diego, CA, USA) before flow cytometric (FACS) analysis (FC500, Beckman Coulter)<sup>3</sup>. In selected experiments, scaffolds retrieved at the end of the culture were fixed for immunohistochemical analyses. Serial 5 μm thick sections were stained using anti-CD138 (760-4248, Roche, Basel, CH) and anti-CD73 (ab124725, Abcam) antibodies.<sup>3</sup>

### **Statistical analysis**

Statistical analyses were performed using the GraphPad software, (Prism 7.0 software) unless otherwise specified. For proliferation and combination assays statistical analysis was performed using two-way ANOVA followed by Dunnett correction for multiple comparisons and multiple t tests with statistical significance determined using the Holm-Sidak method. Statistical analysis of the Kaplan-Meier survival curves was done using the log-rank test.

## References

1. Frenquelli M, Caridi N, Antonini E, et al. The WNT receptor ROR2 drives the interaction of multiple myeloma cells with the microenvironment through AKT activation. *Leukemia* 2019;10.1038/s41375-019-0486-9.
2. Gaviraghi M, Vivori C, Pareja Sanchez Y, et al. Tumor suppressor PNR1 blocks rRNA maturation by recruiting the decapping complex to the nucleolus. *EMBO J* 2018;37(23):e99179.
3. Belloni D, Heltai S, Ponzoni M, et al. Modeling Multiple Myeloma-Bone Marrow interactions and response to drugs in a 3D surrogate microenvironment. *Haematologica* 2018;103(4):707-16.
4. Di Veroli GY, Fornari C, Wang D, et al. Combenefit: An interactive platform for the analysis and visualization of drug combinations. *Bioinformatics* 2016;32(18):2866-2868.
5. Tang J, Wennerberg K, Aittokallio T. What is synergy? The Saariselkä agreement revisited. *Front Pharmacol* 2015;6:181.
6. Fouquier J, Guedj M. Analysis of drug combinations: current methodological landscape. *Pharmacology Research and Perspectives* 2015;3(3):1-11.

## Supplementary figure legends

### **Supplementary Figure 1. Basal levels of DNA damage in MM cells.** (A)

Exponentially growing MM cells were harvested and analysed by immunoblot for the expression of the indicated proteins. GAPDH was used as loading control. (B) Cells as in (A) were harvested, fixed and processed for imaging flow cytometry to detect  $\gamma$ H2AX signal. Results are presented as the mean of the  $\gamma$ H2AX signal for individual nucleus, averaged from a minimum of 2 independent experiments (mean  $\pm$  SEM).

### **Supplementary Figure 2. $\gamma$ H2AX levels in MM cell lines, before and after treatment with HU, melphalan and VX-970.** MM1.S, H929, KMS20 and OPM2 cells were left untreated (NT) or treated with 0.15 $\mu$ M VX-970 (VX)

before the addition of HU (2 mM) or melphalan (50  $\mu$ M) for 3 h. At the end of the treatment, cells were fixed and processed for imaging flow cytometry to detect the  $\gamma$ H2AX signal for individual nucleus (left Y axis). Mean of  $\gamma$ H2AX signal (right Y axis) for each treatment is reported. Results are representative of two independent experiments.

### **Supplementary Figure 3. The VX-970-analog VE-821 and the structurally unrelated ATR inhibitor AZD6738 are less effective than VX-970 in reducing MM cells viability.** MM cells were seeded in 96-well plates and treated for 72 h with DMSO (as control) or with the indicated concentrations of the VX-970-analog VE-821 or the structurally unrelated ATR inhibitor ADZ6738. Cell viability was assessed using CellTiter-Glo assay. Results are presented as the mean percentage of viable cells in treated samples, relative to DMSO control cells averaged from 3 independent experiments (mean $\pm$

SEM) each with 3 replicates per condition. Results of statistical analysis are reported in Supplementary Table 1.

**Supplementary Figure 4. Loewe synergy matrices in MM cells treated with melphalan and VX-970.** The relative drug synergy scores were calculated analyzing the experimental data of Figure 2 A using the Combenefit software. The colored areas are indicative of the degree of synergy between the drug combinations. Different color codes (black, blue and red) are indicative of the concentrations of melphalan used to treat the cells depending on their sensitivity to the drug. NaN, not a number, as resulted from the combination file.

**Supplementary Figure 5. Combination of ATR inhibition by VX-970 and melphalan treatment induces apoptosis in MM cells.** Exponentially growing MM cells were treated with melphalan (MM1.S and H929 0.625  $\mu\text{M}$ ; RPMI and KMS20 1.25  $\mu\text{M}$ ; LP1 and OPM2 10  $\mu\text{M}$ ) either alone or in combination with increasing concentrations of VX-970 (0.075, 0.15 and 0.3  $\mu\text{M}$ ). After 48 h, cells were harvested and stained with Annexin V and PI before FACS analysis. Results are representative of 3 independent experiments.

**Supplementary Figure 6.  $\gamma\text{H2AX}$  levels in MM cell lines, before and after treatment with doxorubicin and KU-55933.** Exponentially growing MM1.S, H929 and RPMI 8226 cells were either left untreated (NT) or treated with VX-970 (VX, 0.15  $\mu\text{M}$ ) or KU-55933 (KU, 10  $\mu\text{M}$ ) before the addition of doxorubicin (0.5  $\mu\text{M}$ ) for 3 h. At the end of the treatment, cells were fixed and processed for imaging flow cytometry to detect the  $\gamma\text{H2AX}$  signal for individual

nucleus (left Y axis). Mean of  $\gamma$ H2AX signal (right Y axis) for each treatment is reported. Results are representative of two independent experiments.

**Supplementary Figure 7. ATM inhibition does not increase the apoptosis induced by doxorubicin in MM cells.** Exponentially growing MM cells were left untreated (NT) or treated with KU-55933 (KU, 10  $\mu$ M) and doxorubicin (Doxo, 0.5  $\mu$ M) either alone or in combination (KU/Doxo). After 72 h, cells were harvested and stained with Annexin V and PI before FACS analysis. Results are representative of 3 independent experiments.

**Supplementary Figure 8. Loewe synergy matrices in MM cells treated with doxorubicin and KU-55933.** Loewe synergy matrices and the relative drug synergy scores calculated analyzing the experimental data of Figure 3 B using the Combenefit software. The colored areas are indicative of the degree of synergy between the drug combinations. Different color codes (red, blue and black) are indicative of the concentrations of doxorubicin used to treat the cells depending on their sensitivity to the drug.

**Supplementary Figure 9. ATM inhibition by KU-55933 has limited activity on MM cells *per se* but is synergic with ATR inhibition by VX-970.** (A) MM cells were seeded in 96-well plates and treated for 72 h with DMSO (as control, NT) or increasing concentrations of KU-55933 either alone or in combination with the indicated doses of VX-970. Cell viability was assessed using CellTiter-Glo assay. Results are presented as the mean percentage of viable cells in treated samples, relative to DMSO control cells averaged from a minimum of 3 independent experiments (mean  $\pm$  SEM) each with 3 replicates per condition. Proliferation curves for each cell line were generated using

GraphPad Prism and presented on the left panels of the figure. The dotted vertical line indicates the response of MM cells to increasing concentrations of KU-55933 alone. Filled black dots indicate the cellular response to VX-970 alone. Results of statistical analysis are reported in Supplementary Table 4. (B) For each cell line, the Bliss and the Loewe synergy matrices were obtained analyzing the experimental data with the Combenefit software. The colored areas are indicative of the degree of synergy between the drug combinations.

**Supplementary Figure 10. Effect of ATR and ATM inhibition on  $\gamma$ H2AX intensity and foci in MM cells.** Exponentially growing MM1.S, H929, RPMI 8226 and U266 cells were left untreated (NT) or treated with 0.15  $\mu$ M VX-970 and 10  $\mu$ M KU-55933 either alone or in combination for 4 h. At the end of the treatment, cells were fixed and processed for imaging flow cytometry. Results are representative of two independent experiments. (A)  $\gamma$ H2AX intensity for individual nucleus (left Y axis) and the mean of  $\gamma$ H2AX signal (right Y axis) for each treatment are reported. (B) The number of  $\gamma$ H2AX foci for individual nucleus (left Y axis) and the mean of  $\gamma$ H2AX foci (right Y axis) for each treatment are reported.

**Supplementary Figure 11. Combination of ATR inhibition by VX-970 and melphalan treatment induces apoptosis in U266 cells without ongoing DNA damage.** (A) U266-melphalan resistant cells were treated with melphalan either alone or in combination with increasing concentrations of VX-970 (0.075, 0.15 and 0.3  $\mu$ M). After 48 h, cells were harvested, and immunoblotted for the indicated antibodies. The levels of cleaved PARP and



caspase-3 served as indicators of apoptosis. GAPDH was used as loading control. (B) Cells were treated as in (A). After 48 h, cells were harvested, and stained with Annexin V and PI before FACS analysis. Results are representative of 3 independent experiments.

**Supplementary Figure 12. ATM inhibition by KU-55933 alone or in combination with doxorubicin does not restrain proliferation in cells without ongoing DNA damage.**

(A) Exponentially growing U266 cells were left untreated (NT) or treated with VX-970 (VX, 0.15  $\mu$ M) or KU-55933 (KU, 10  $\mu$ M). Treatment with both compounds initiated 1 h before the addition of doxorubicin (0.5  $\mu$ M). After 3 h, cells were fixed and processed for imaging flow cytometry to detect the  $\gamma$ H2AX signal for individual nucleus (left Y axis). Mean of  $\gamma$ H2AX signal (right Y axis) for each treatment is reported. Results are representative of two independent experiments. (B) As in (A), cells were either left untreated (NT) or treated with increasing concentrations of KU-55933 (KU, 5 and 10  $\mu$ M) and VX-970 (VX, 0.15  $\mu$ M). At the end of the treatment cells were harvested and analyzed by immunoblot for the expression of the indicated proteins. GAPDH was used as loading control. (C) Cells were seeded in 96-well plates and treated for 72 h with DMSO (as control, NT) or increasing concentrations of KU-55933 either alone or in combination with the indicated doses of doxorubicin. Cell viability was assessed using CellTiter-Glo assay. Results are presented as the mean percentage of viable cells in treated samples, relative to DMSO control cells averaged from a minimum of 3 independent experiments (mean  $\pm$  SEM), each with 3 replicates per condition. Proliferation curves were generated using

GraphPad Prism. The dotted vertical line indicates the response of the cells to increasing concentrations of KU-55933 alone. Filled black dots indicate the cellular response to doxorubicin alone. The Bliss and the Loewe synergy matrices with the relative drug synergy scores calculated using the Combenefit software are reported on the right of the proliferation profile. The colored areas are indicative of the degree of synergy between the drug combinations. Results of statistical analysis are reported in Supplementary Table 3. (D) Exponentially growing U266 cells were left untreated (NT) or treated with KU-55933 (KU, 10  $\mu$ M) and doxorubicin (Doxo, 0.5  $\mu$ M) either alone or in combination (KU/Doxo). After 72 h, cells were harvested and stained with Annexin V and PI before FACS analysis. Results are representative of 3 independent experiments.

**Supplementary Figure 13. ATR inhibition by VX-970 sensitizes U266 cells to melphalan in vivo.** Rag2<sup>-/-</sup> $\gamma$ c<sup>-/-</sup> mice were injected intravenously with 5x10<sup>6</sup> U266-Luc cells. (A) Treatment was performed according to the schedule reported, starting 8 weeks after injection, when the tumour burden became evident by BLI (week 8). BLI was performed every week during the treatment and one week after the stop of the treatment (week 12). (B) The graph shows the tumour burden increase quantified as total flux measured from bioluminescent images during the treatment period. Data represent the mean  $\pm$  SD of 5 mice in each treatment arm. Statistical analysis was performed using the two-way ANOVA and Tukey's multiple comparison test (\*p<0.05).

**Supplementary Figure 14. ATR inhibition by VX-970 sensitizes HeLa and**

**U2OS cells to melphalan.** (A) HeLa and U2OS cells were seeded in 96-well plates and treated for 72 h with DMSO (as control, NT) or increasing concentrations of VX-970 either alone or in combination with the indicated doses of melphalan. Cell viability was assessed using CellTiter-Glo assay. Results are presented as the mean percentage of viable cells in treated samples, relative to DMSO control cells averaged from a minimum of 3 independent experiments (mean  $\pm$  SEM), each with 3 replicates per condition. Proliferation curves for each cell line were generated using GraphPad Prism. The dotted vertical line indicates the response of the cells to increasing concentrations of VX-970 alone. Filled black dots indicate the cellular response to melphalan alone. For each cell line the Bliss synergy matrices and the relative drug synergy scores were calculated using the Combenefit software. The colored areas in the matrix are indicative of the degree of synergy between the drug combinations. Different color codes (black, blue and red) are indicative of the concentrations of melphalan used to treat the cells depending on their sensitivity to the drug. (B) Cells were treated with the indicated concentrations of VX-970 and melphalan either alone or in combination. Representative pictures were taken after 48 h of treatment.

**Supplementary Figure 15. CDC25A interference in MM cells.** RPMI 8226

and HeLa cells were transduced with two different lentiviral constructs targeting CDC25A, sh#704 and sh#112. Non-targeting scramble shRNA was used as negative control (CTRL). (A) Knock down efficiency was verified by PCR analysis. CDC25A RNA levels were normalized to TBP mRNA levels.

Results are presented as fold relative to CTRL. (B) Cells expressing CTRL and shCDC25A constructs were seeded in 96-well plates left untreated (NT) or treated with the indicated concentrations of VX-970 and melphalan either alone or in combination for 72 h. Cell viability was assessed using CellTiter-Glo assay. Results are presented as the mean percentage of viable cells in treated samples, normalized to the relative DMSO control cells and are representative of 2 (for HeLa cells) and 3 (for RPMI 8226) independent experiments each with 3 replicates per condition.

## **Supplementary table legends**

**Supplementary Table 1. Comparison of the effects of ATR inhibitors, VX-970, VE-821 and AZD6738 in different MM cell lines.** # Statistical analysis was performed using two-way ANOVA followed by Dunnett correction for multiple comparisons. ## Multiple t tests were performed and statistical significance determined using the Holm-Sidak method, with alpha=5.000%. Only significant results are shown.

**Supplementary Table 2. Comparison of the effects of VX-970 alone or in combination with Melphalan in different MM cell lines.** # Statistical analysis was performed using two-way ANOVA followed by Dunnett correction for multiple comparisons. ## Multiple t tests were performed and statistical significance determined using the Holm-Sidak method, with alpha=5.000%. Only significant results are shown.

**Supplementary Table 3. Comparison of the effects of KU-55933 alone or in combination with Doxorubicin in different MM cell lines.** Statistical

analysis was performed using two-way ANOVA followed by Dunnett correction for multiple comparisons. ## Multiple t tests were performed and statistical significance determined using the Holm-Sidak method, with alpha=5.000%. Only significant results are shown.

**Supplementary Table 4. Comparison of the effects of VX-970 alone or in combination with KU-55933 in different cell lines.** # Statistical analysis was performed using 2 way ANOVA followed by Dunnett correction for multiple comparisons. ## Multiple t tests were performed and statistical significance determined using the Holm-Sidak method, with alpha=5.000%. Only significant results are shown.

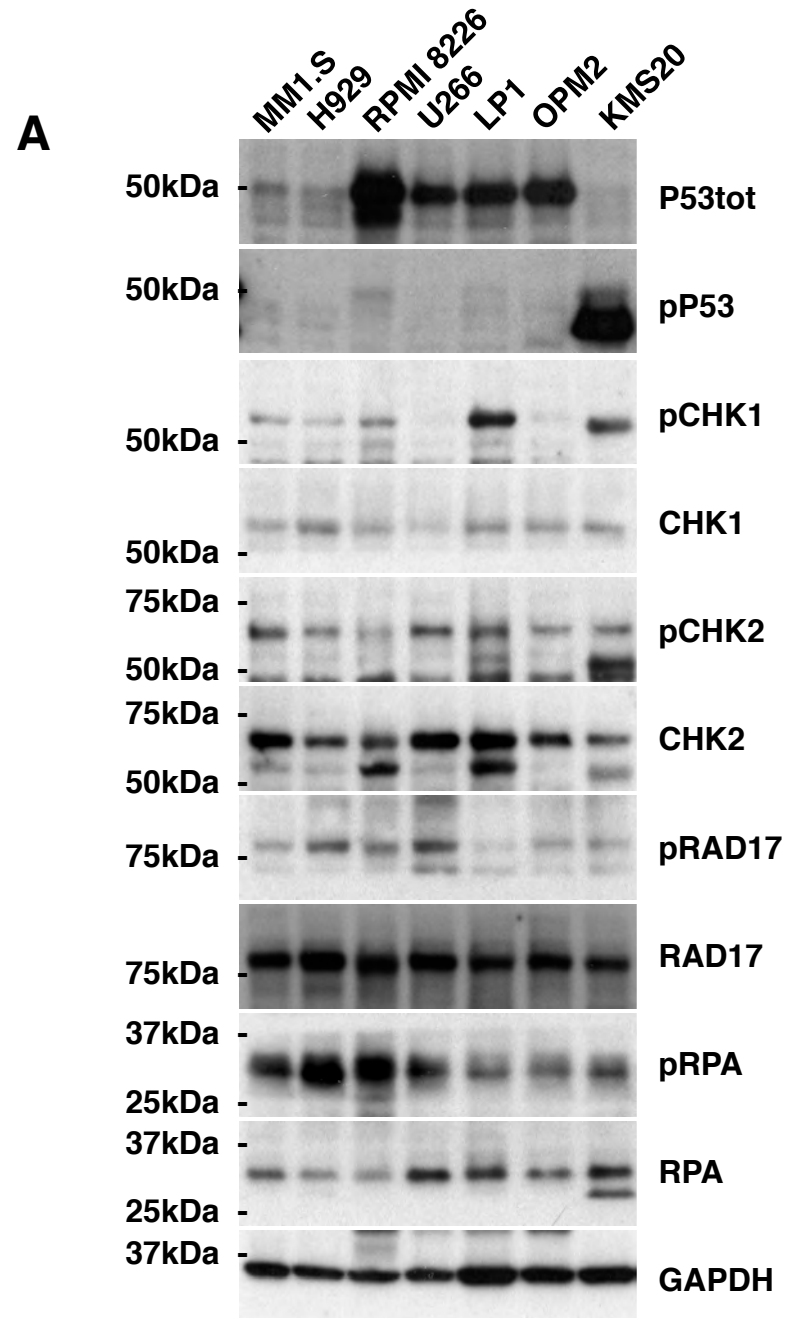

**B**

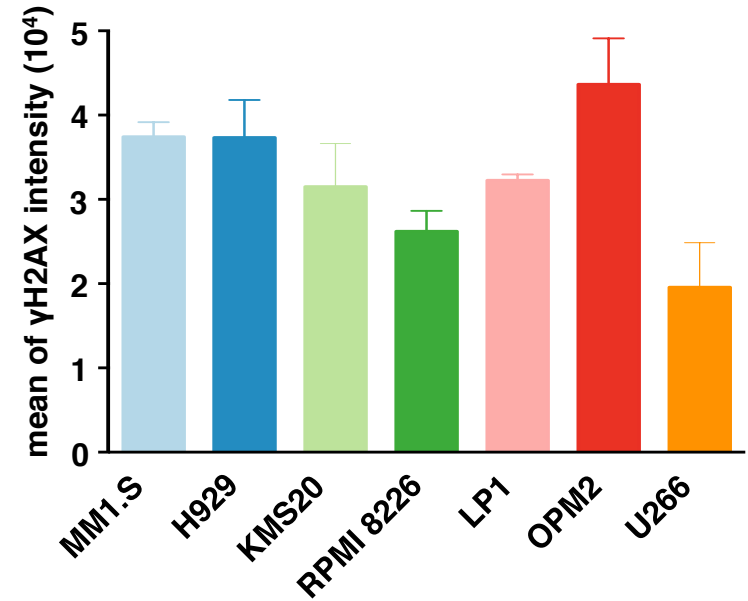

Supplementary Figure 1

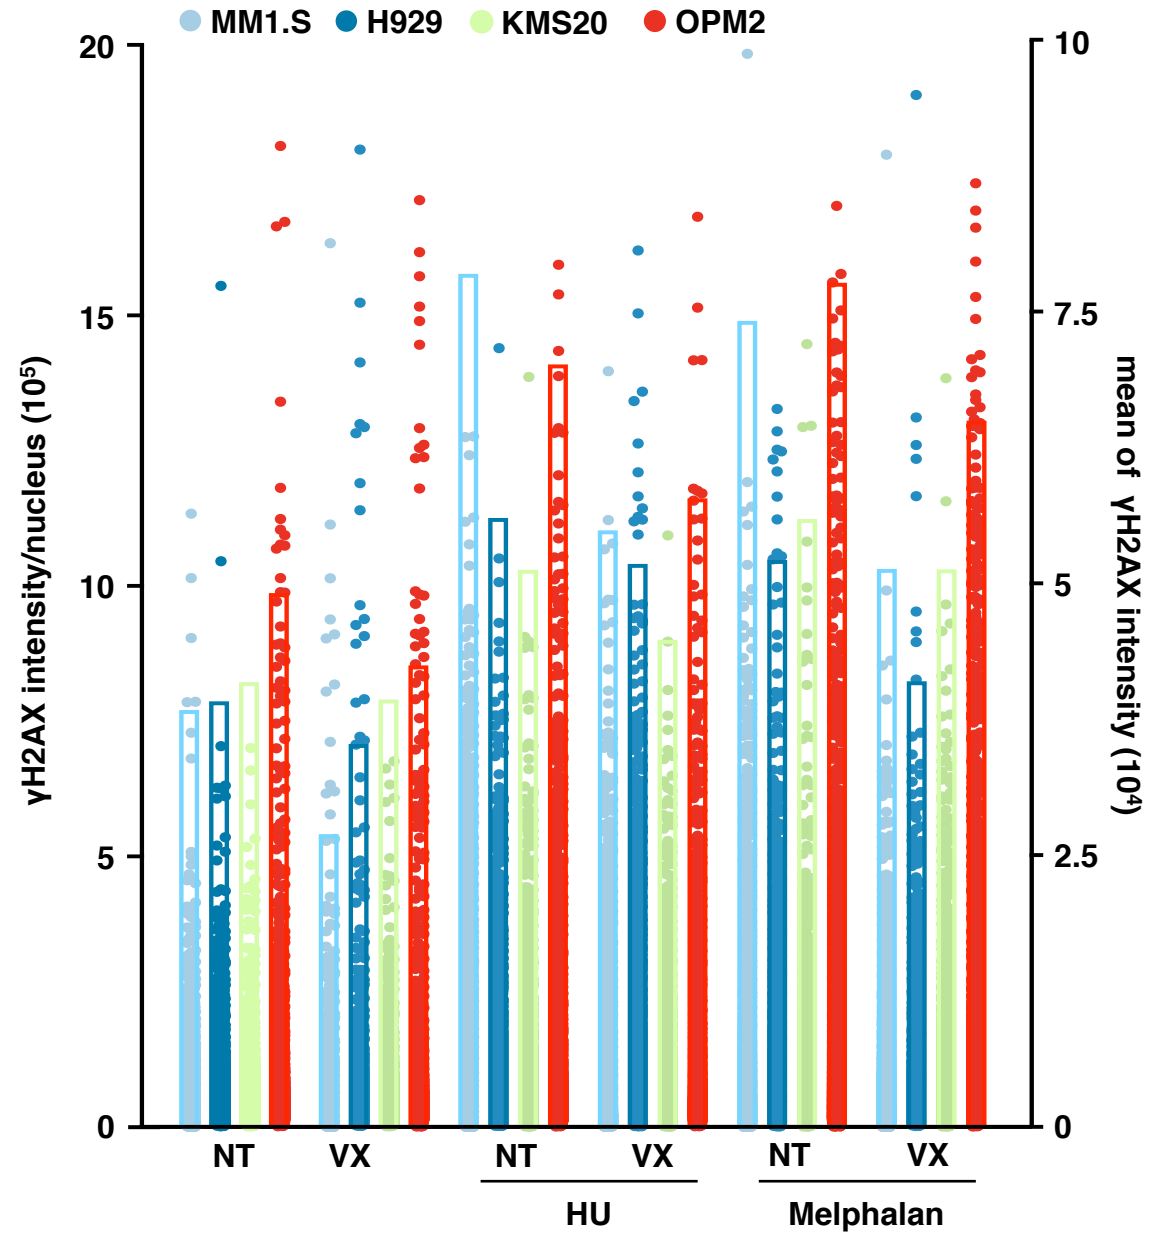

Supplementary Figure 2

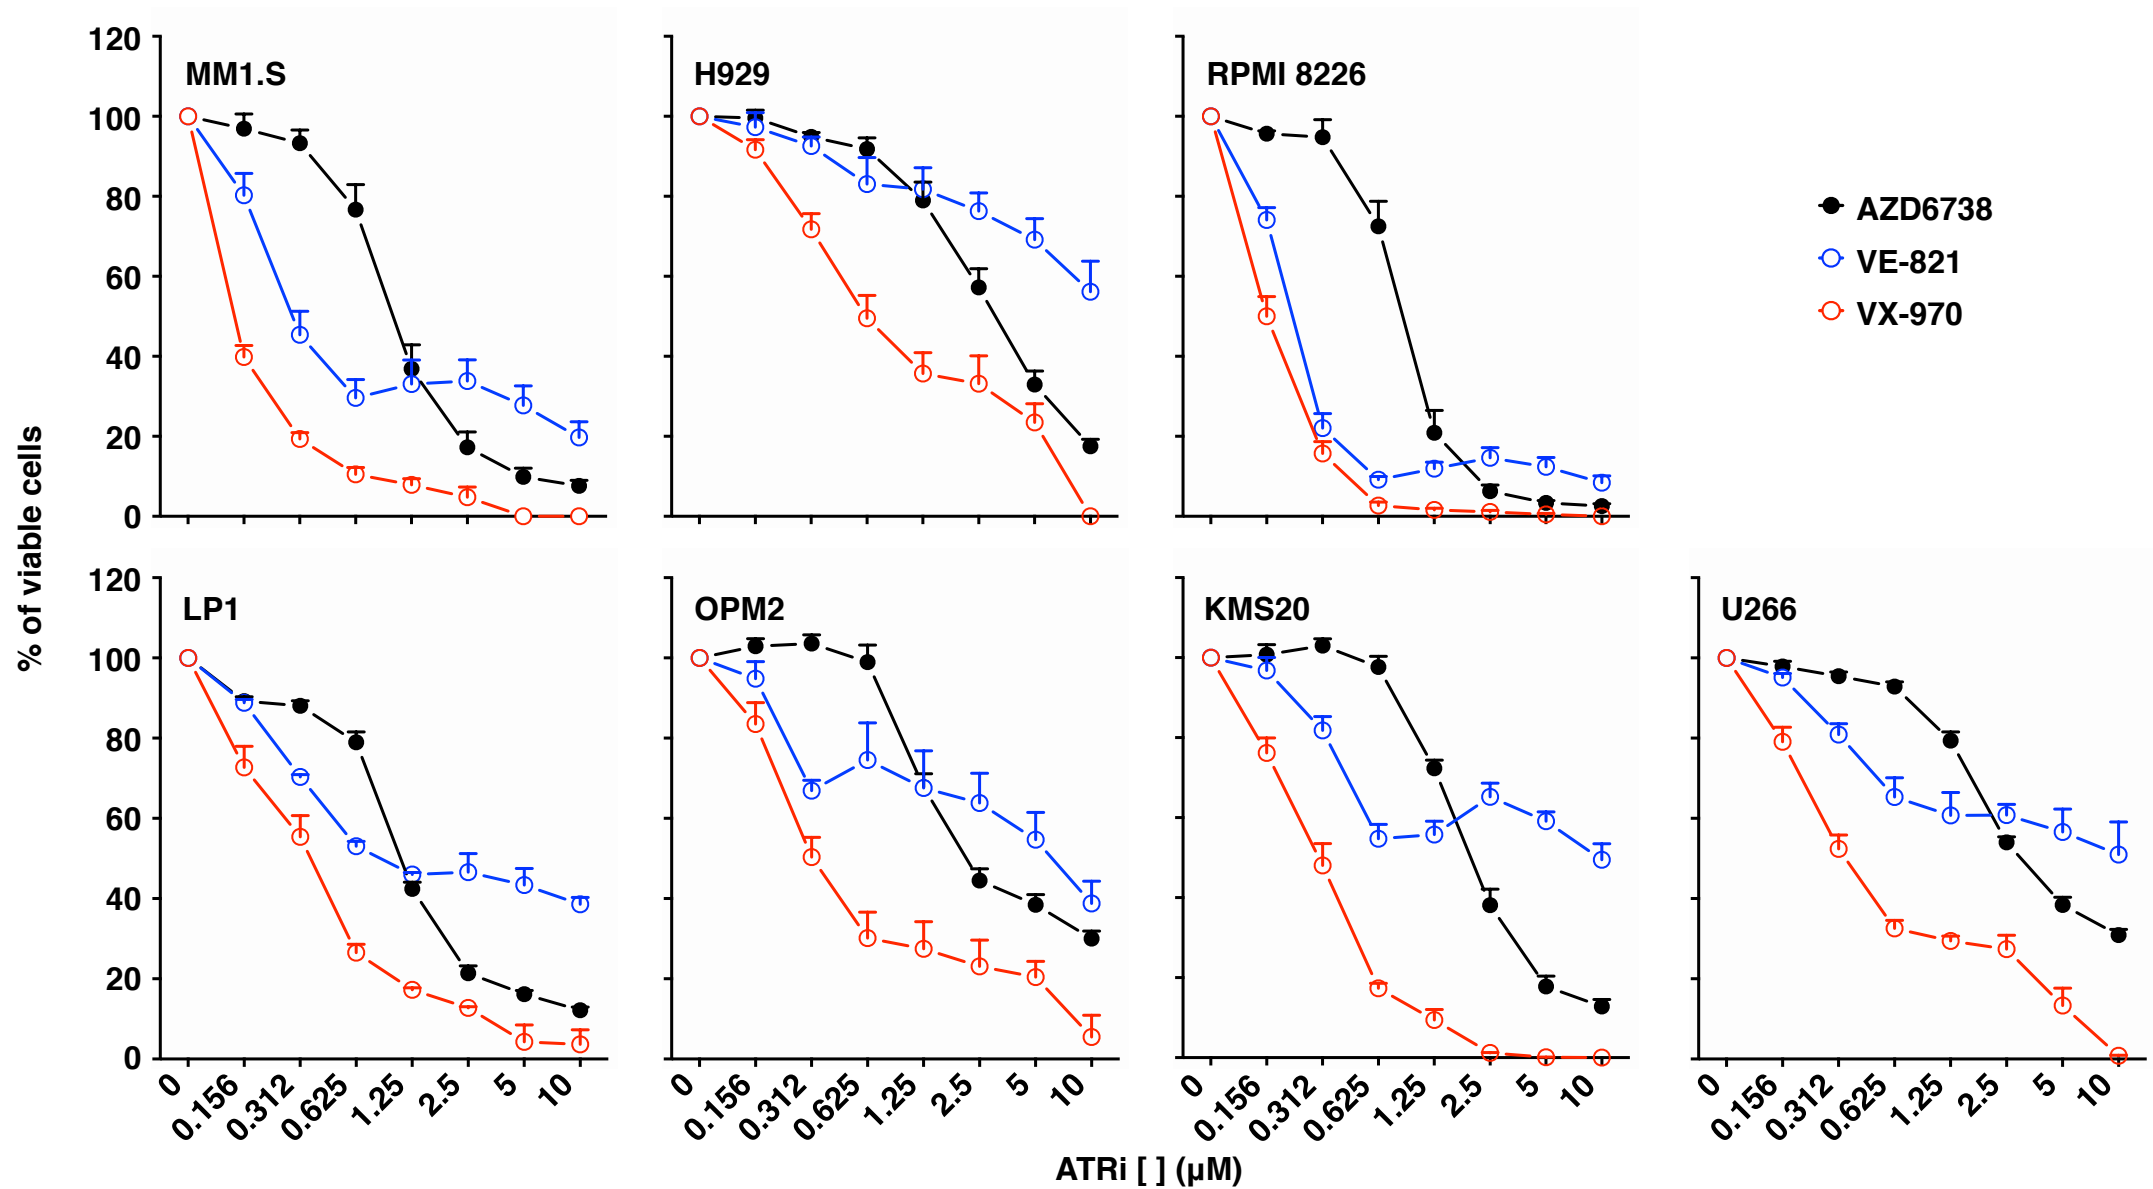

Supplementary Figure 3



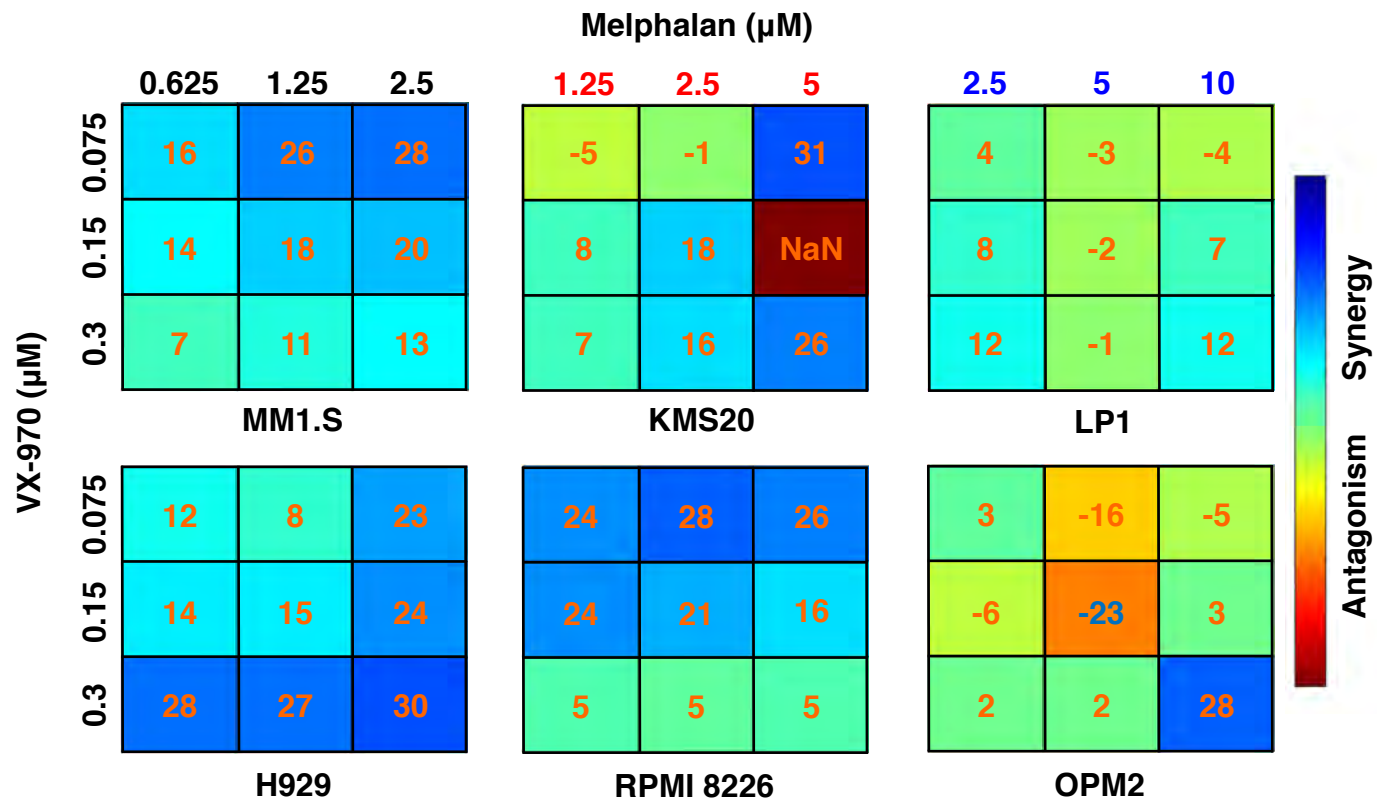

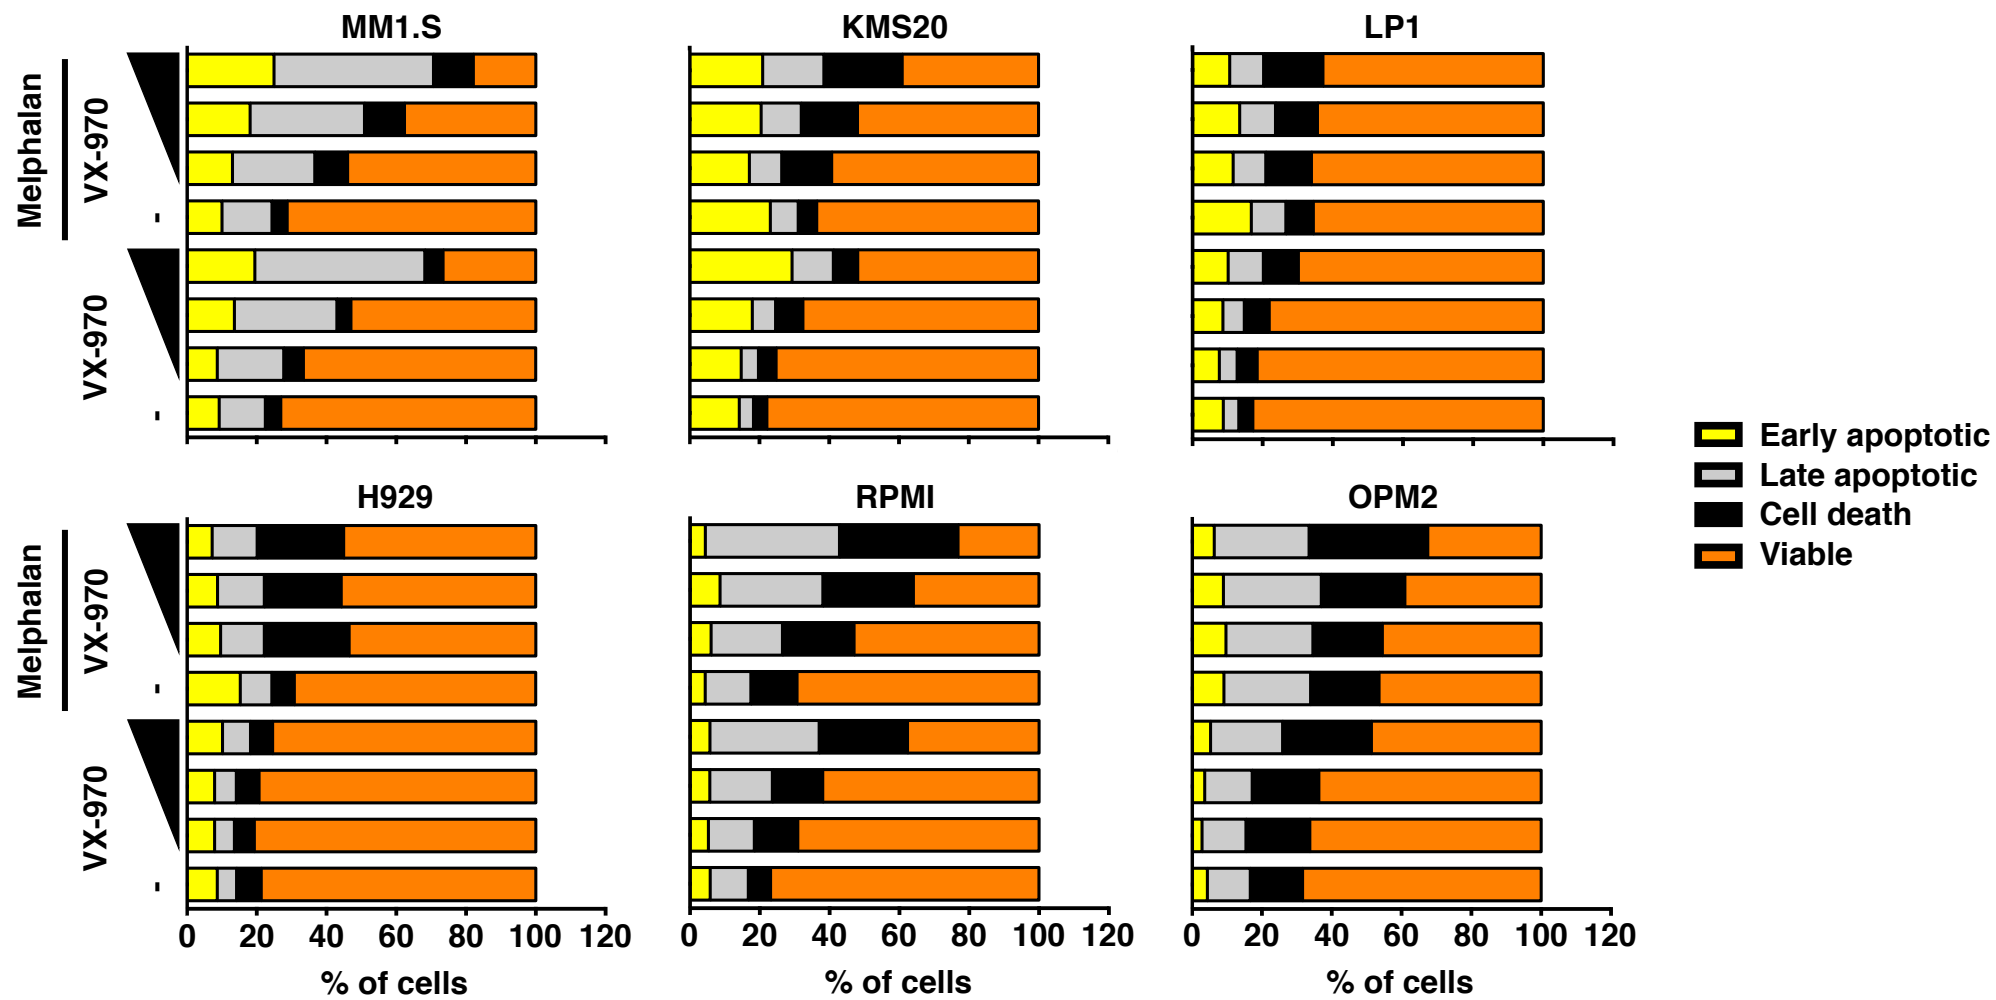

Supplementary Figure 5

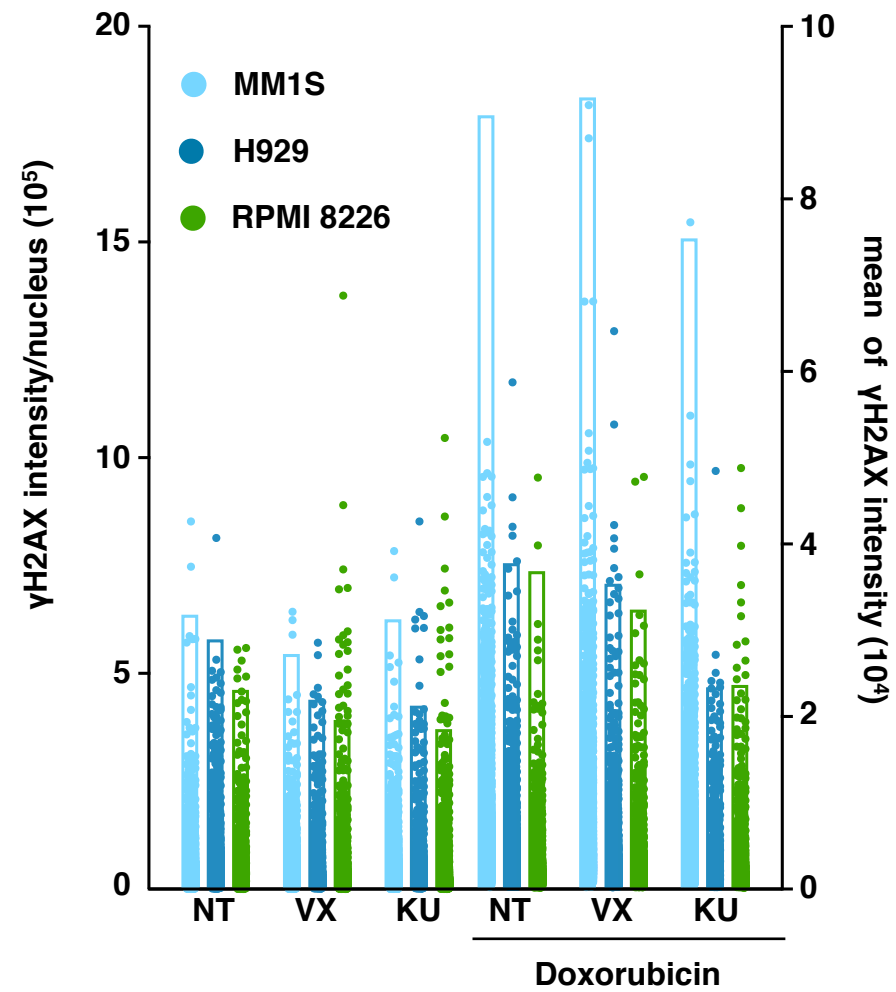

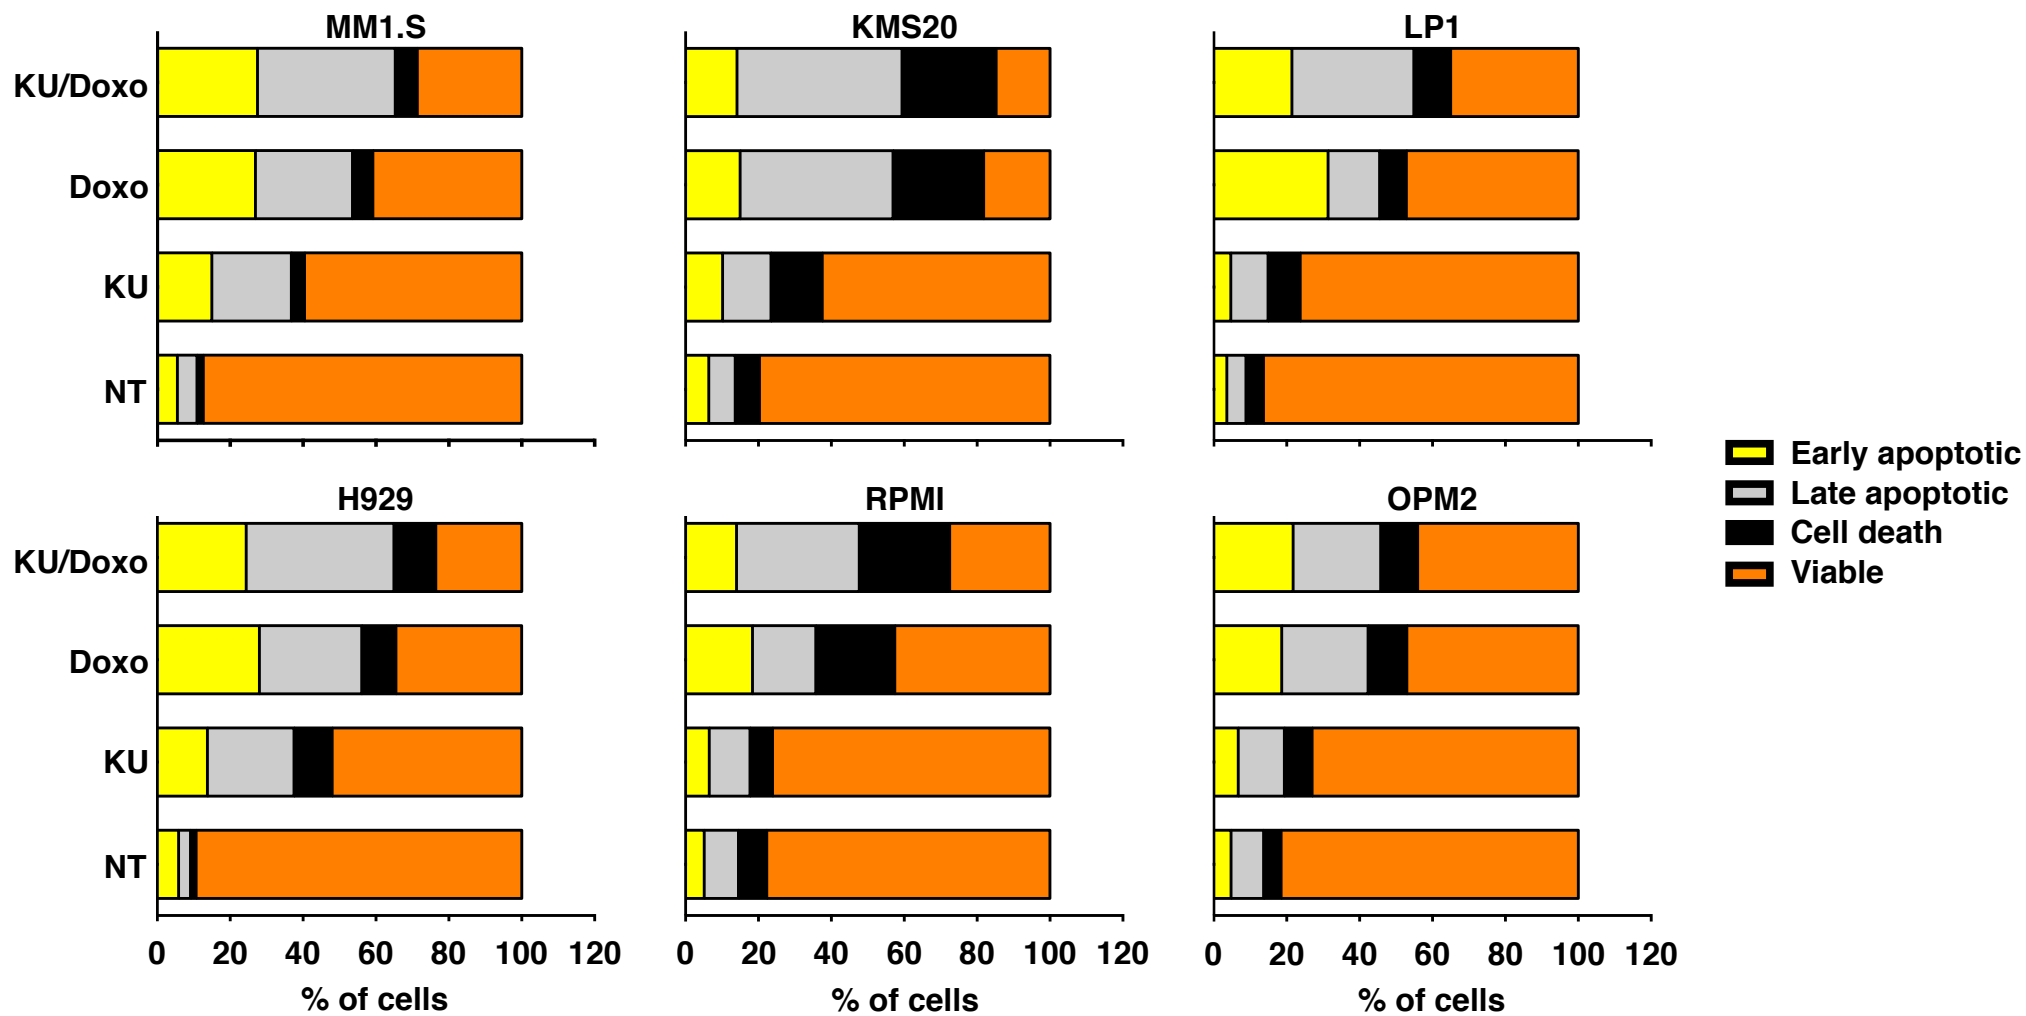

Supplementary Figure 7

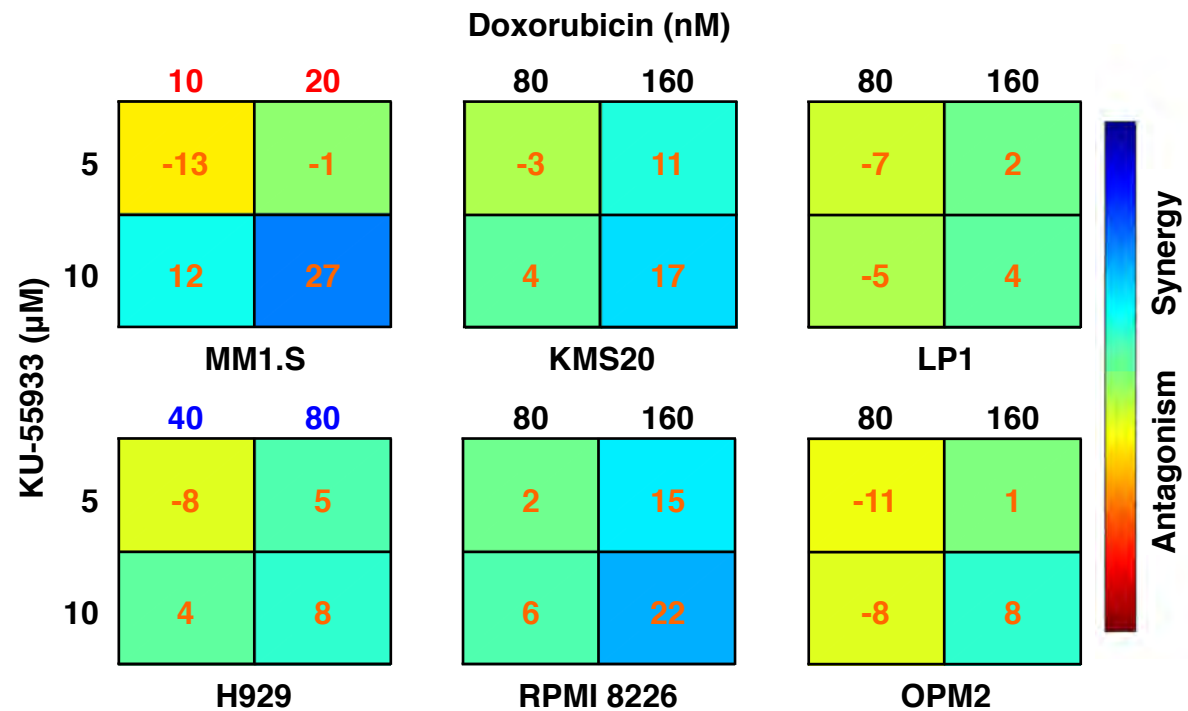

**A**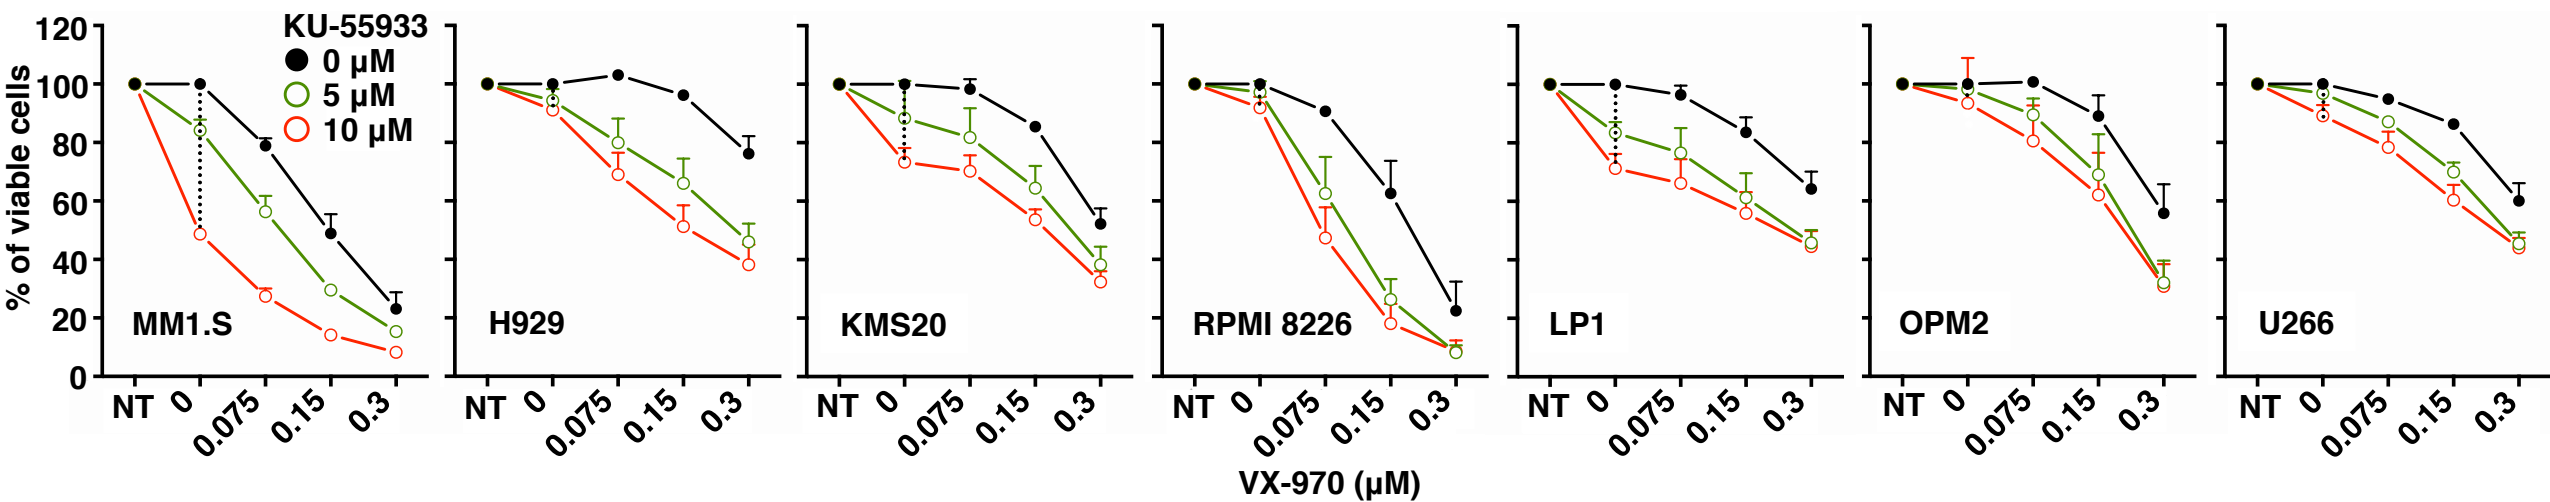**B**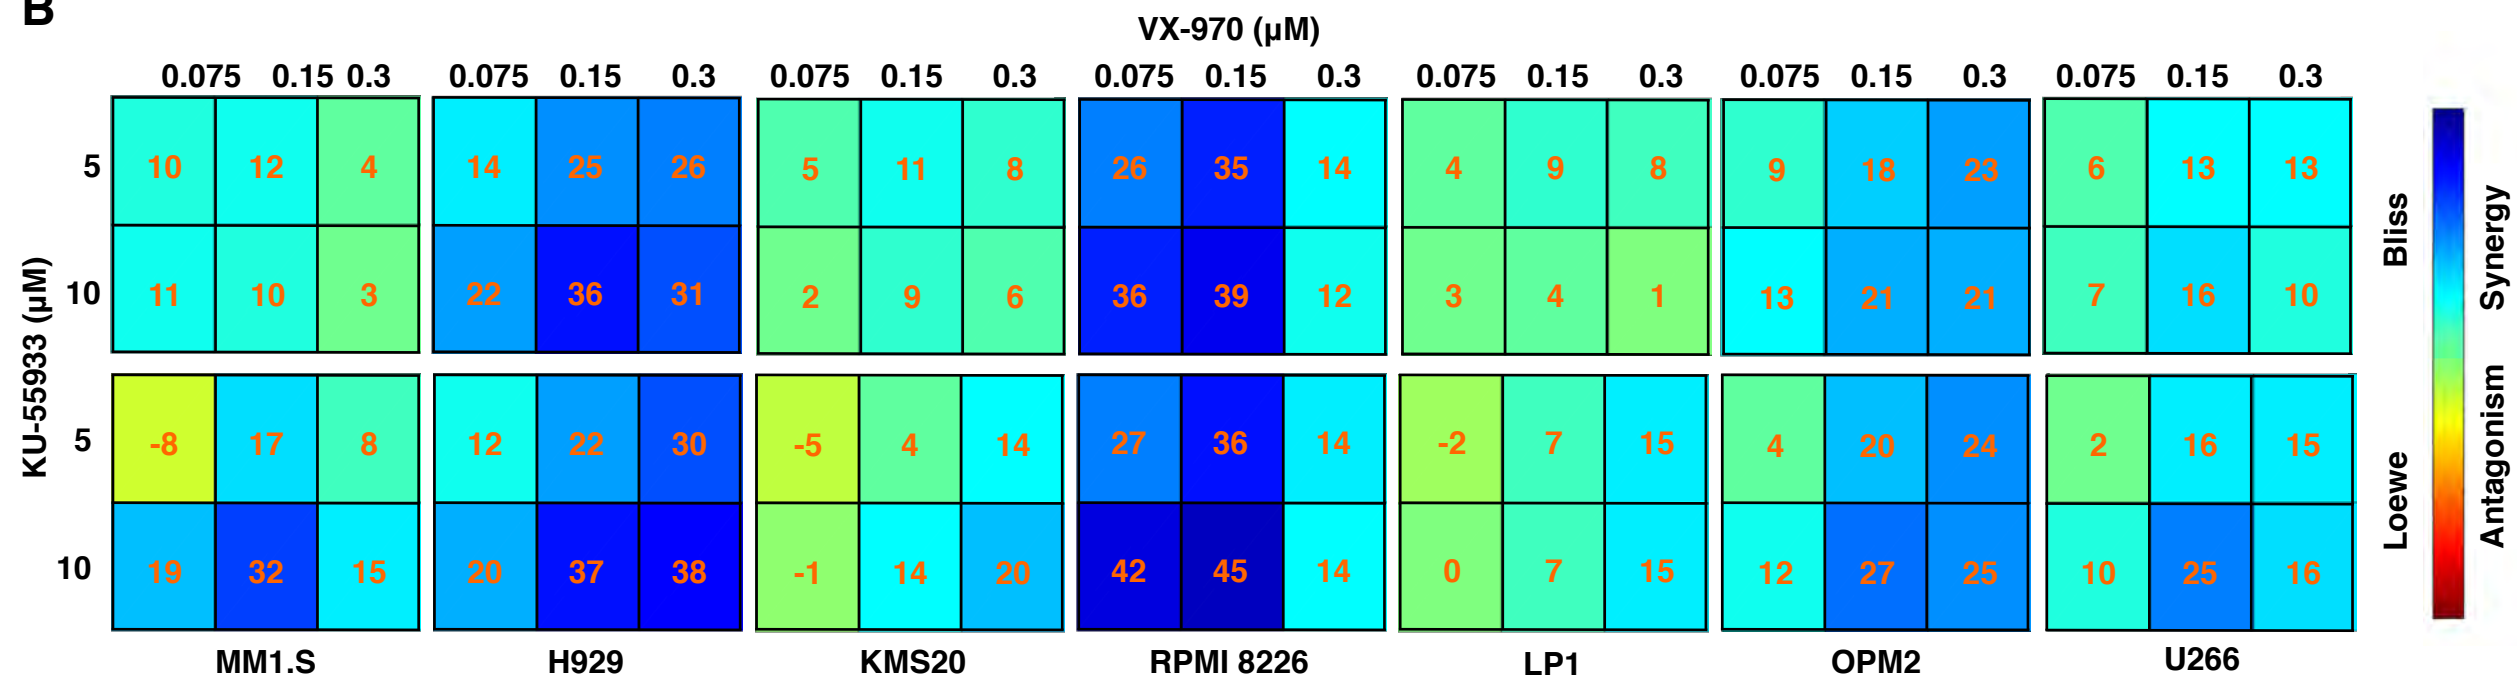

**A**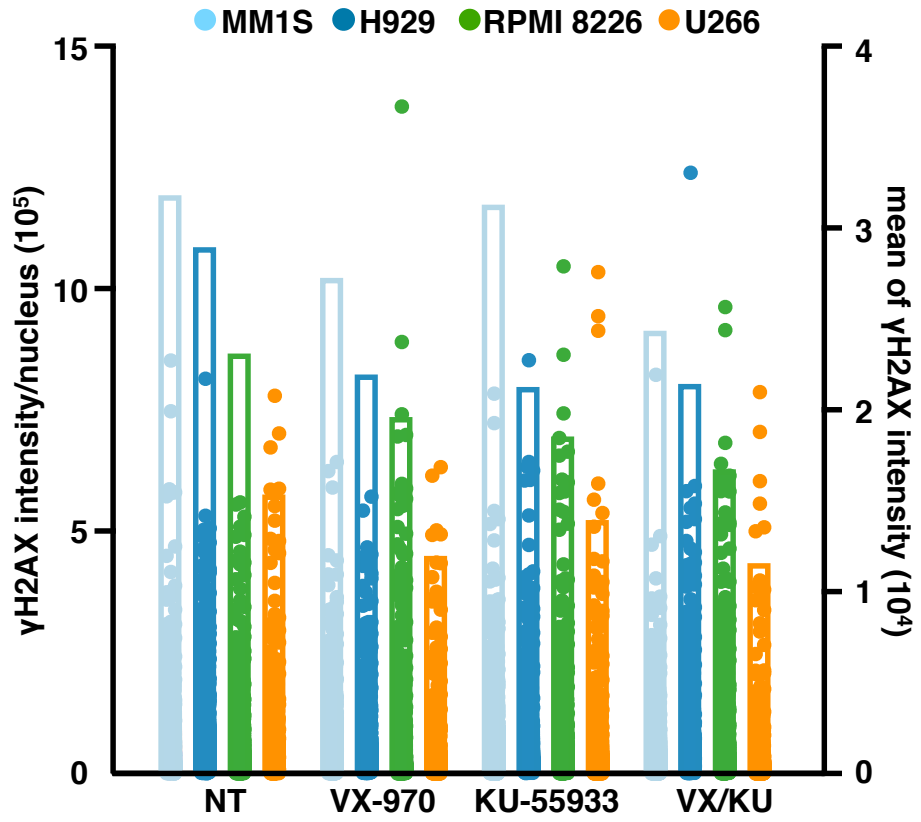**B**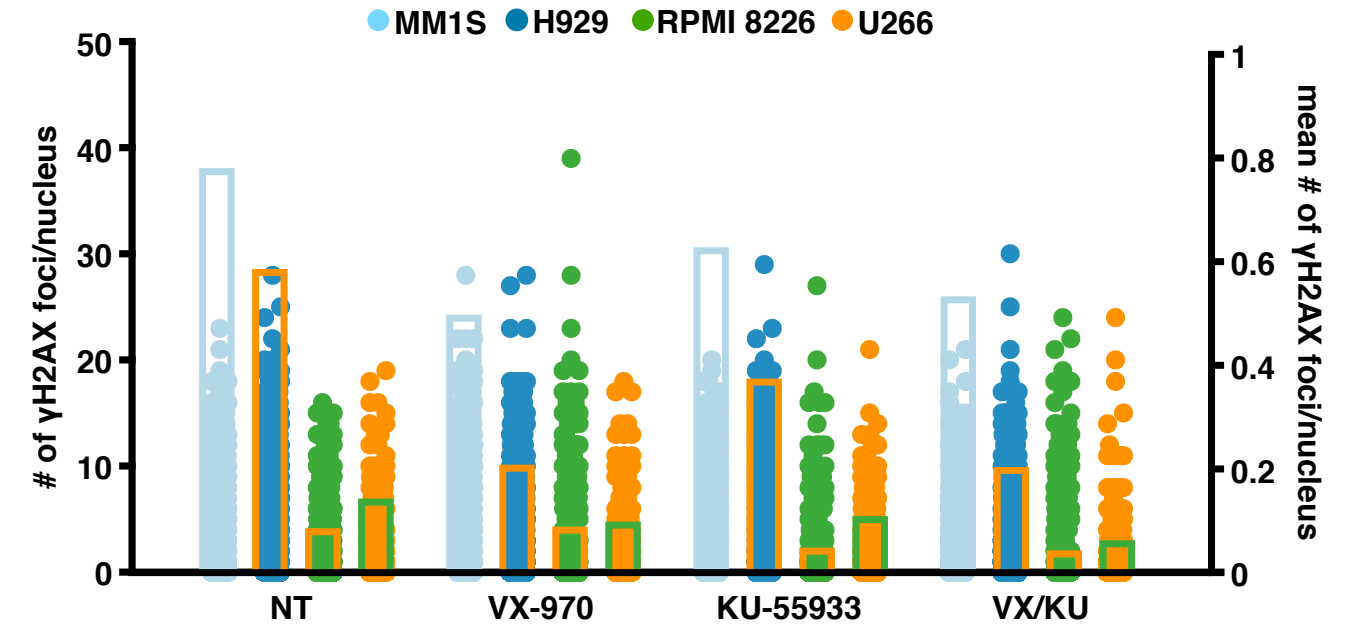

**A**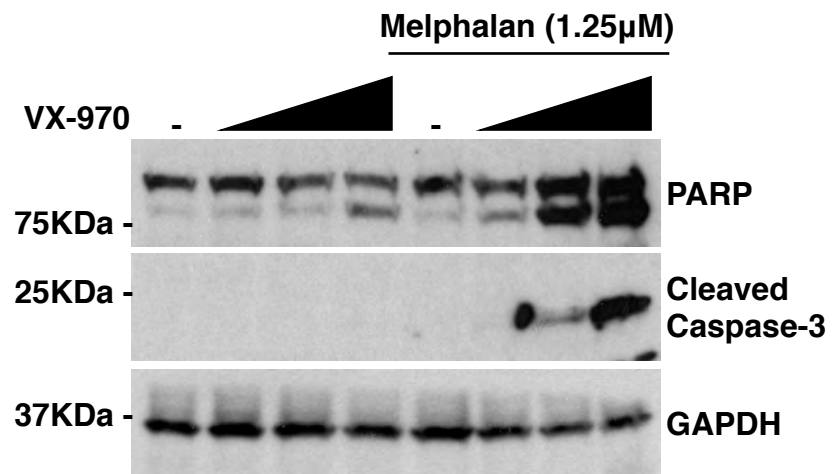**B**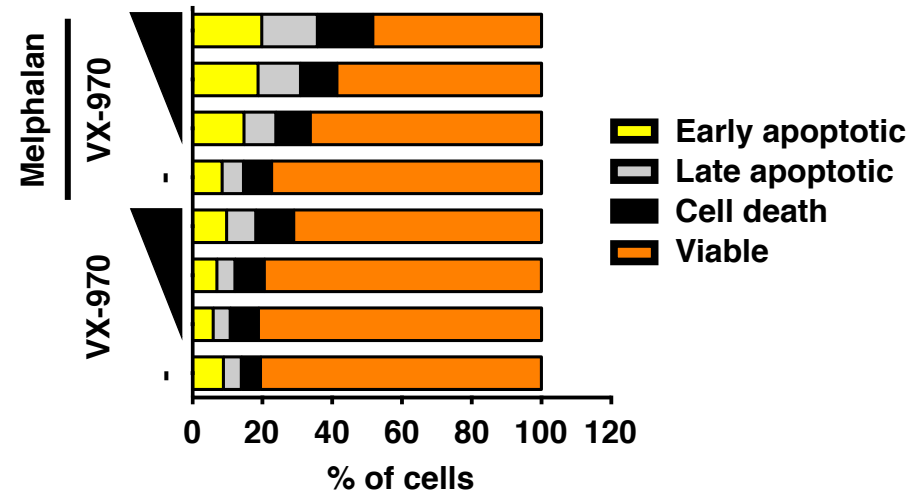



**A**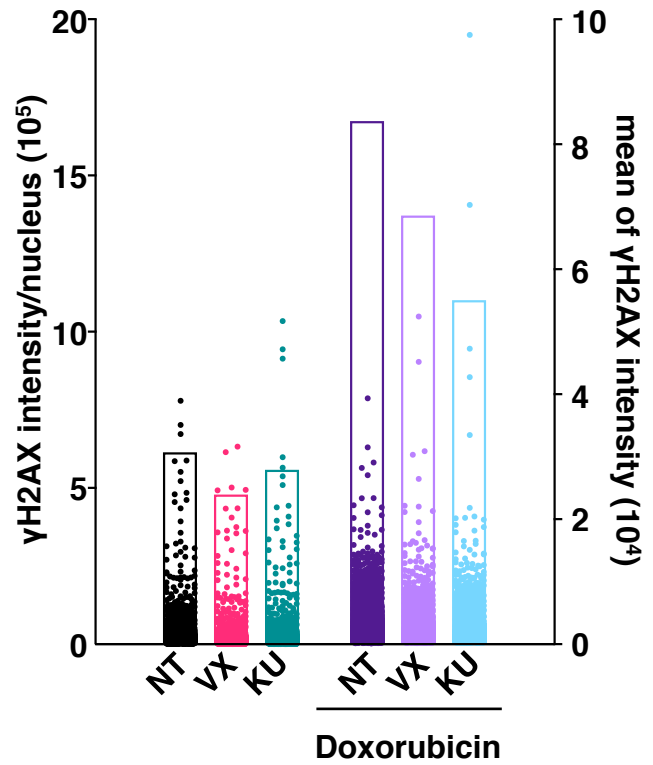**B**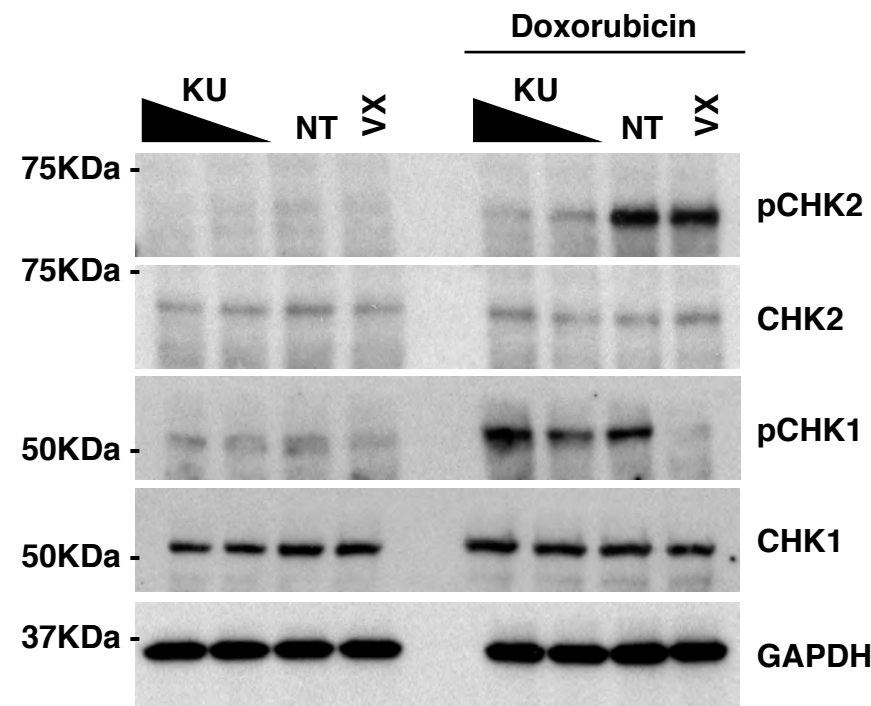**C**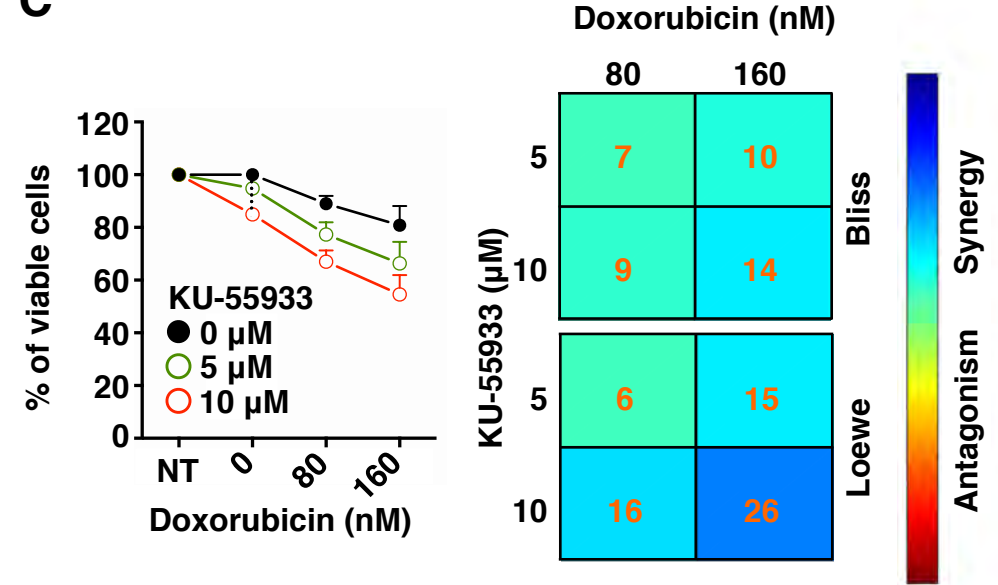**D**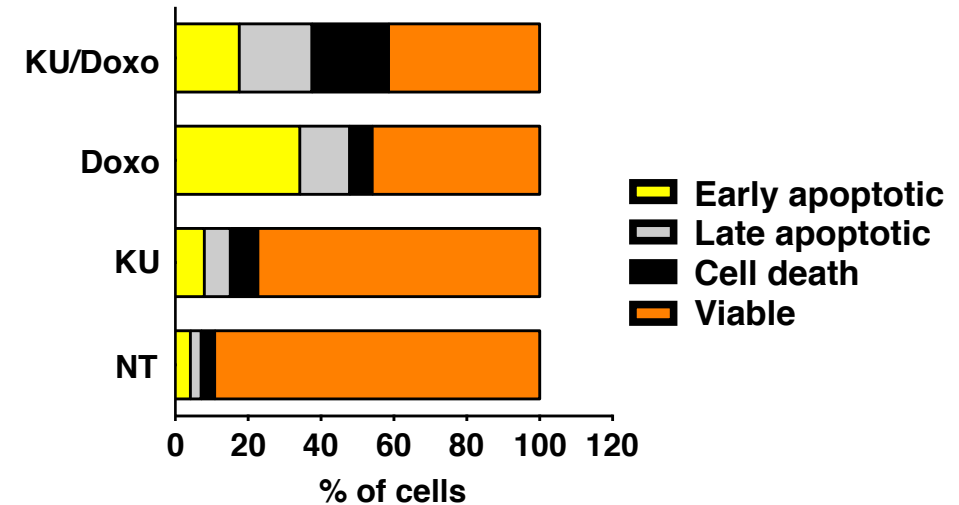

Supplementary Figure 12

**A**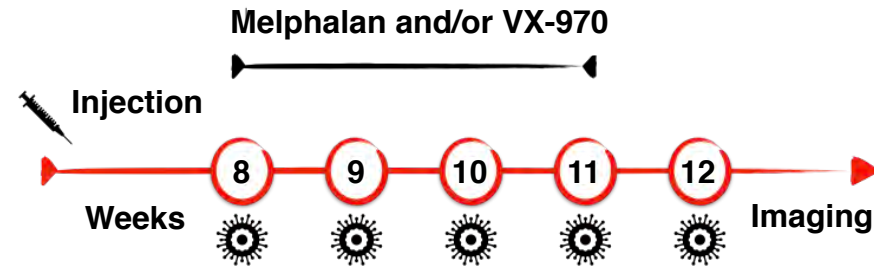**B**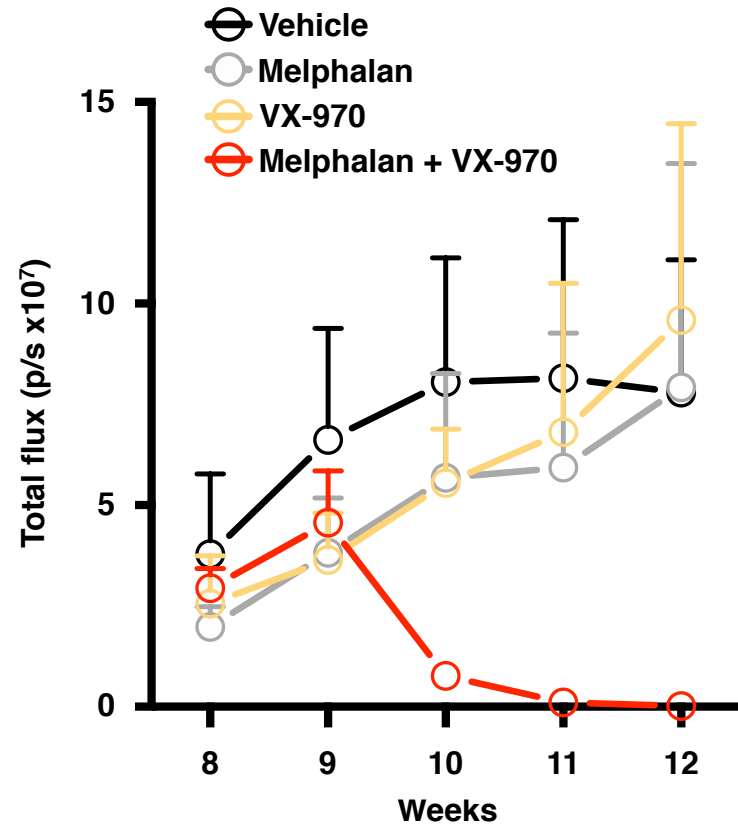

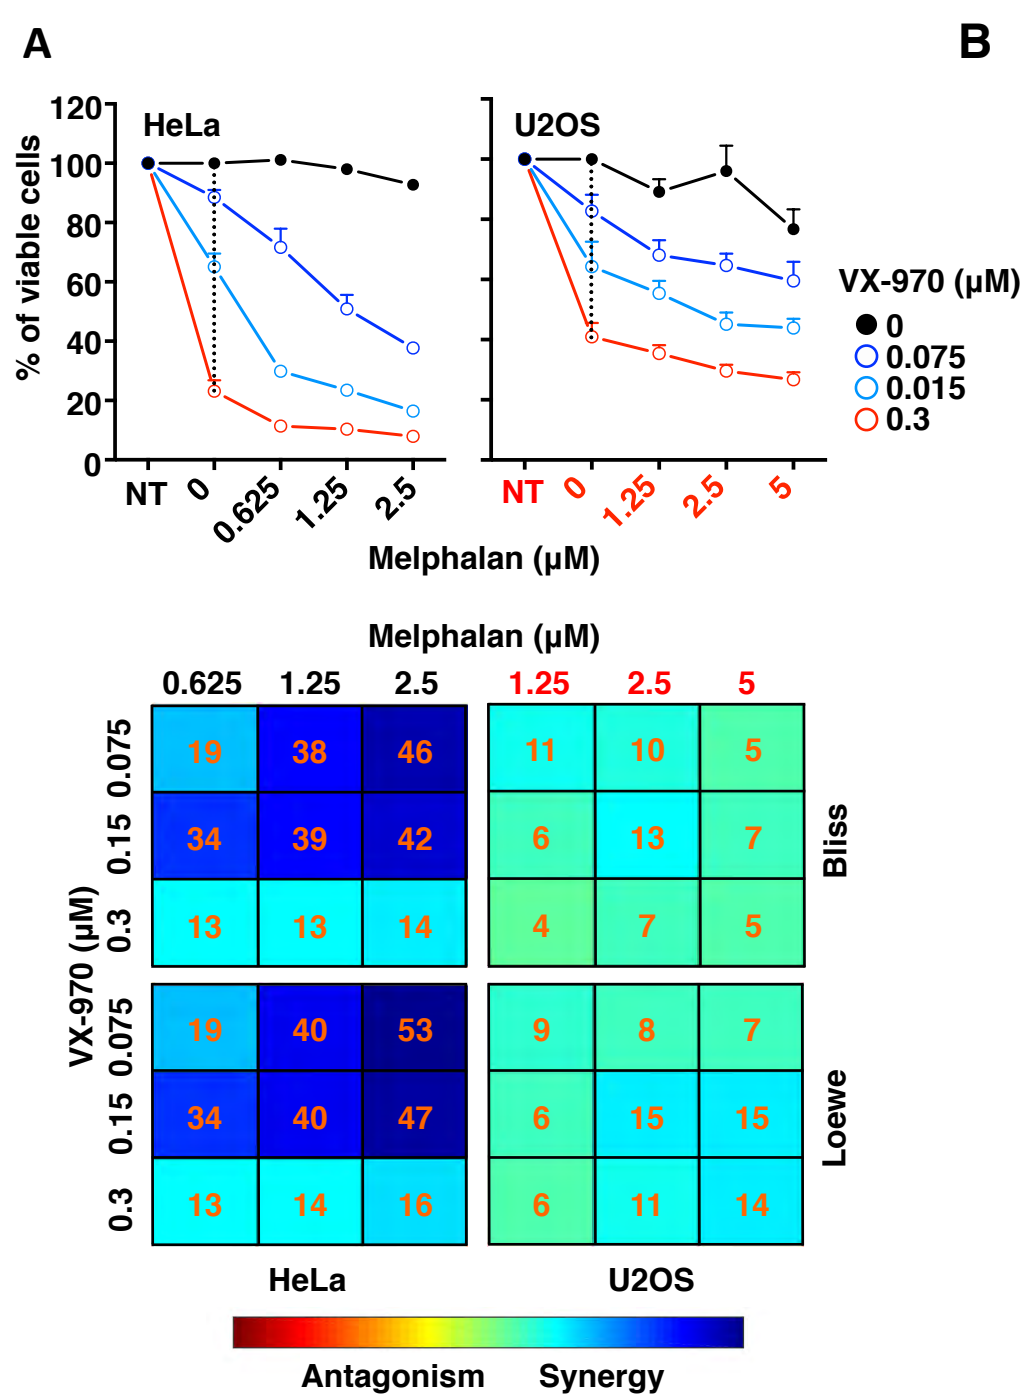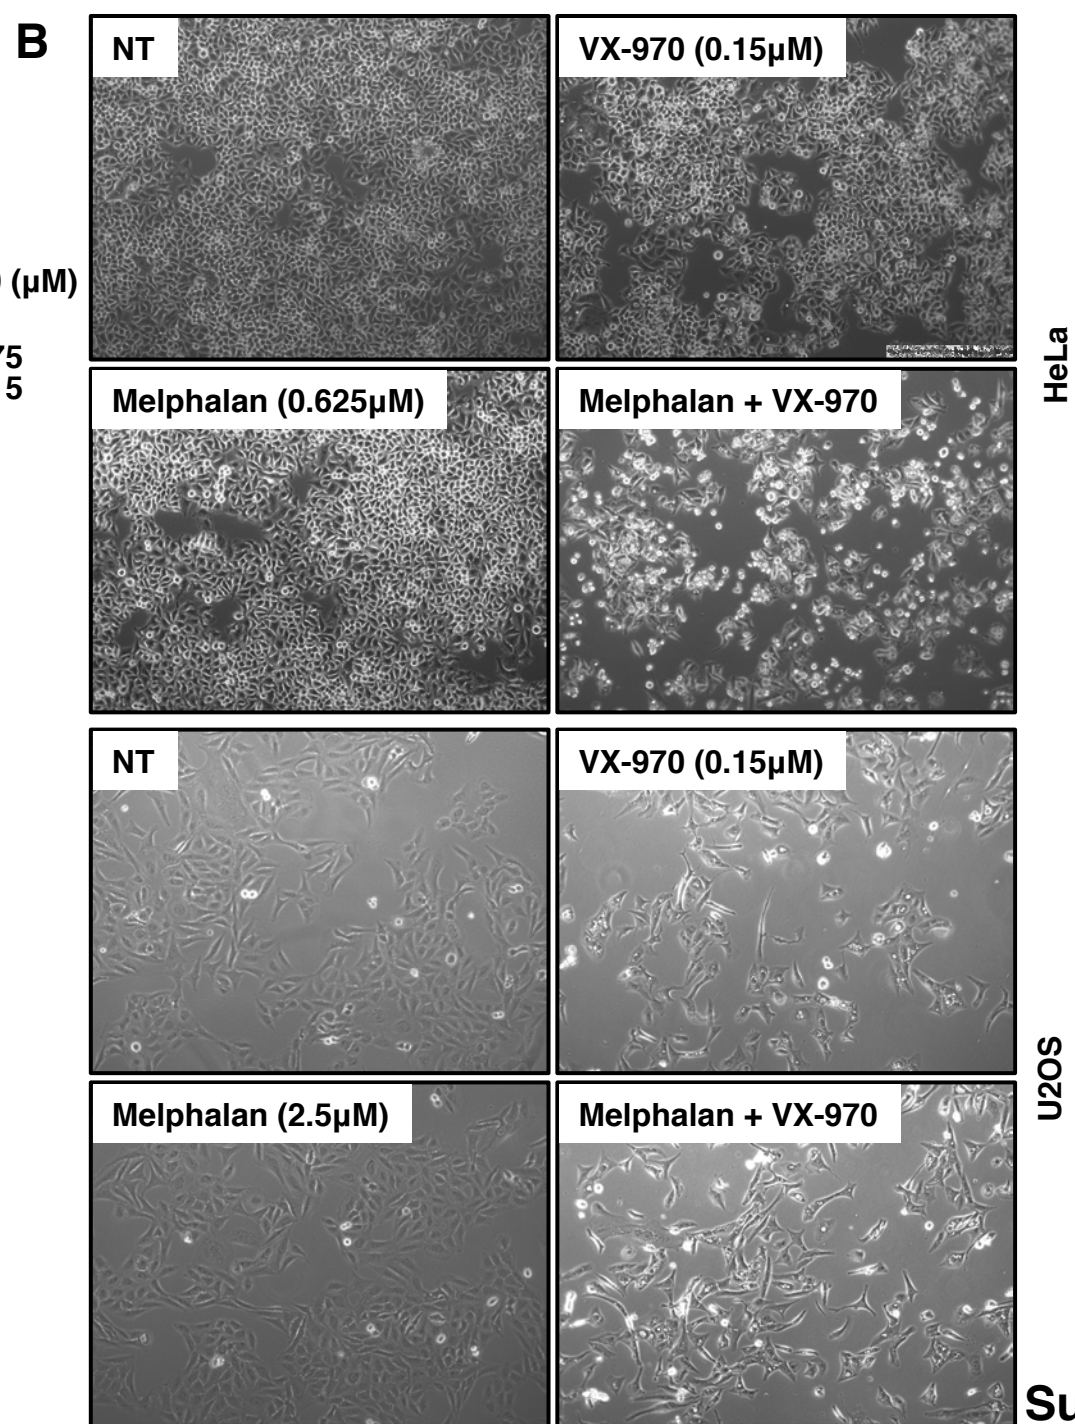

Supplementary Figure 14

**A**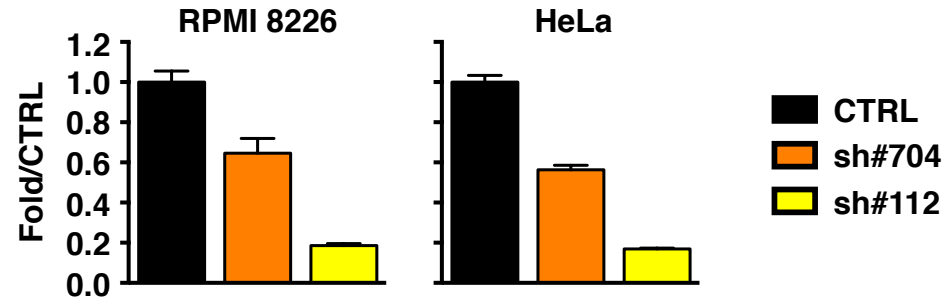**B**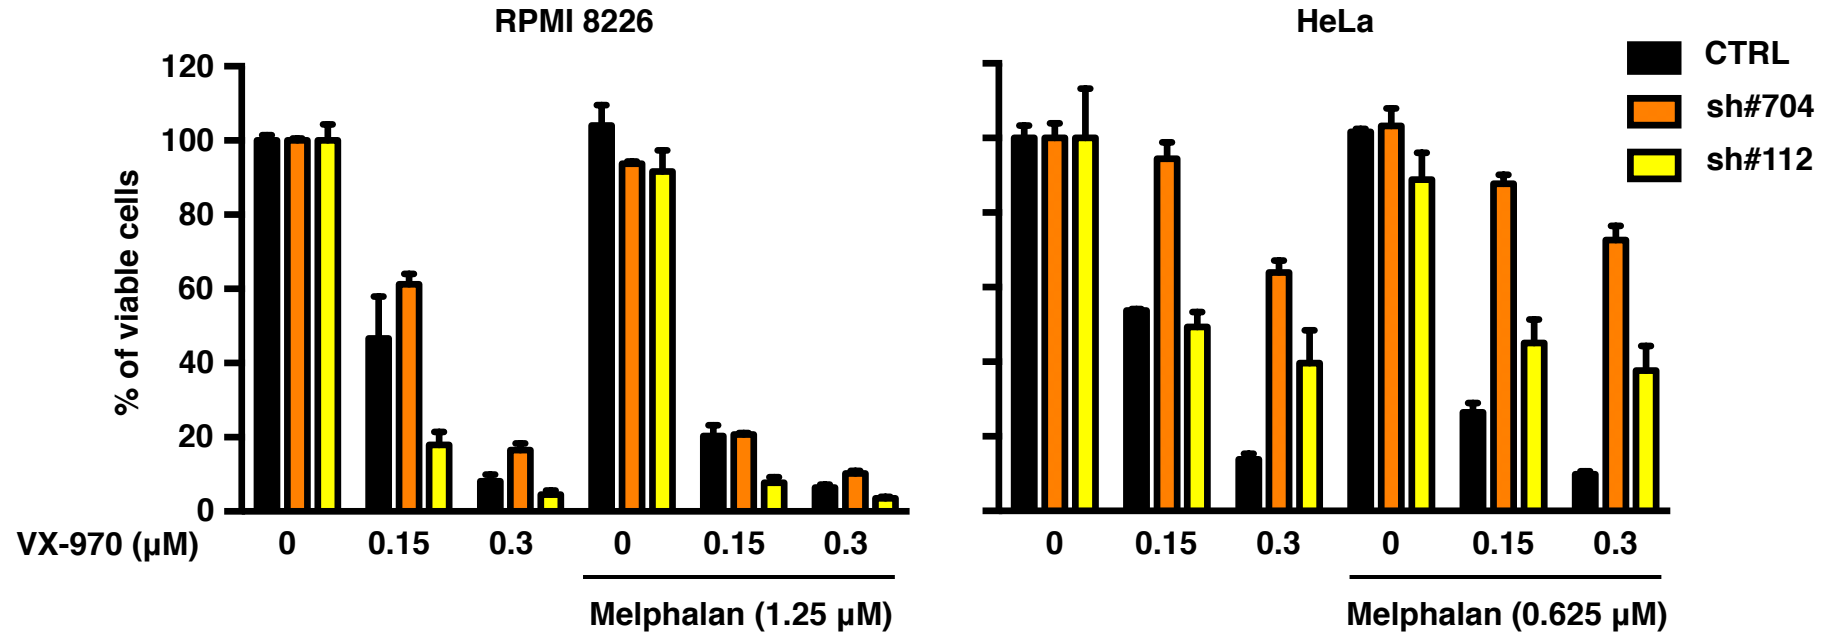

**Supplementary Table 1**

**Comparison of the effects of different ATR inhibitors, VX-970, VE-821 and AZD6738 in different MM cell lines using the GrapPad software**

# Statistical analysis was performed using two-way ANOVA followed by Dunnett correction for multiple comparisons.

## Multiple t tests were performed and statistical significance determined using the Holm-Sidak method, with alpha=5.000%. Only significant results are shown.

| Dunnett's multiple comparisons test# |           |                  |              |         |
|--------------------------------------|-----------|------------------|--------------|---------|
| MM1.S                                | Mean Diff | 95% CI of diff   | Significant? | Summary |
| <b>0µM</b>                           |           |                  |              |         |
| VX-970 vs.VE-821                     | 0         | -8,926 to 8,926  | No           | ns      |
| VX-970 vs.AZD6738                    | 0         | -9,563 to 9,563  | No           | ns      |
| <b>0.15µM</b>                        |           |                  |              |         |
| VX-970 vs.VE-821                     | -40,4     | -50,91 to -29,89 | Yes          | ****    |
| VX-970 vs.AZD6738                    | -57,06    | -66,69 to -47,43 | Yes          | ****    |
| <b>0.3µM</b>                         |           |                  |              |         |
| VX-970 vs.VE-821                     | -26,05    | -35,68 to -16,41 | Yes          | ****    |
| VX-970 vs.AZD6738                    | -73,95    | -83,59 to -64,32 | Yes          | ****    |
| <b>0.6µM</b>                         |           |                  |              |         |
| VX-970 vs.VE-821                     | -19,12    | -30,51 to -7,741 | Yes          | ***     |
| VX-970 vs.AZD6738                    | -66,18    | -78,07 to -54,29 | Yes          | ****    |
| <b>1.2µM</b>                         |           |                  |              |         |
| VX-970 vs.VE-821                     | -25,21    | -37,82 to -12,60 | Yes          | ****    |
| VX-970 vs.AZD6738                    | -29,03    | -41,64 to -16,43 | Yes          | ****    |
| <b>2.5µM</b>                         |           |                  |              |         |
| VX-970 vs.VE-821                     | -29,05    | -41,66 to -16,44 | Yes          | ****    |
| VX-970 vs.AZD6738                    | -12,5     | -25,11 to 0,1118 | No           | ns      |
| <b>5µM</b>                           |           |                  |              |         |
| VX-970 vs.VE-821                     | -27,68    | -40,29 to -15,07 | Yes          | ****    |
| VX-970 vs.AZD6738                    | -9,831    | -22,44 to 2,778  | No           | ns      |
| <b>10µM</b>                          |           |                  |              |         |
| VX-970 vs.VE-821                     | -19,7     | -33,43 to -5,971 | Yes          | **      |
| VX-970 vs.AZD6738                    | -7,588    | -21,32 to 6,139  | No           | ns      |

| Dunnett's multiple comparisons test# |           |                   |              |         |
|--------------------------------------|-----------|-------------------|--------------|---------|
| H929                                 | Mean Diff | 95% CI of diff    | Significant? | Summary |
| <b>0µM</b>                           |           |                   |              |         |
| VX-970 vs.VE-821                     | 0         | -10,22 to 10,22   | No           | ns      |
| VX-970 vs.AZD6738                    | 0         | -13,20 to 13,20   | No           | ns      |
| <b>0.15µM</b>                        |           |                   |              |         |
| VX-970 vs.VE-821                     | -5,604    | -19,06 to 7,854   | No           | ns      |
| VX-970 vs.AZD6738                    | -7,904    | -21,36 to 5,554   | No           | ns      |
| <b>0.3µM</b>                         |           |                   |              |         |
| VX-970 vs.VE-821                     | -20,81    | -34,27 to -7,351  | Yes          | **      |
| VX-970 vs.AZD6738                    | -23,1     | -36,56 to -9,645  | Yes          | ***     |
| <b>0.6µM</b>                         |           |                   |              |         |
| VX-970 vs.VE-821                     | -33,56    | -45,94 to -21,18  | Yes          | ****    |
| VX-970 vs.AZD6738                    | -42,29    | -56,75 to -27,84  | Yes          | ****    |
| <b>1.2µM</b>                         |           |                   |              |         |
| VX-970 vs.VE-821                     | -46,08    | -59,79 to -32,36  | Yes          | ****    |
| VX-970 vs.AZD6738                    | -43,26    | -58,88 to -27,65  | Yes          | ****    |
| <b>2.5µM</b>                         |           |                   |              |         |
| VX-970 vs.VE-821                     | -43,16    | -58,09 to -28,23  | Yes          | ****    |
| VX-970 vs.AZD6738                    | -24,08    | -40,77 to -7,388  | Yes          | **      |
| <b>5µM</b>                           |           |                   |              |         |
| VX-970 vs.VE-821                     | -45,68    | -61,30 to -30,07  | Yes          | ****    |
| VX-970 vs.AZD6738                    | -9,478    | -26,17 to 7,215   | No           | ns      |
| <b>10µM</b>                          |           |                   |              |         |
| VX-970 vs.VE-821                     | -56,1     | -71,71 to -40,48  | Yes          | ****    |
| VX-970 vs.AZD6738                    | -17,47    | -34,17 to -0,7816 | Yes          | *       |

| Multiple t test##        |             |           |         |            |                  |         |    |  |
|--------------------------|-------------|-----------|---------|------------|------------------|---------|----|--|
| MM1.S                    | P value     | Mean1     | Mean2   | Difference | SE of difference | t ratio | df |  |
| <b>VX-970 vs.VE-821</b>  |             |           |         |            |                  |         |    |  |
| 0.15µM                   | 1,04985E-13 | 39,8454   | 80,2478 | -40,4024   | 4,64241          | 8,70289 | 94 |  |
| 0.3µM                    | 2,1284E-08  | 19,3363   | 45,3818 | -26,0455   | 4,25484          | 6,12137 | 94 |  |
| 2.5µM                    | 1,08775E-06 | 4,7678    | 33,8223 | -29,0545   | 5,57089          | 5,21541 | 94 |  |
| 5µM                      | 3,00559E-06 | 0,0268766 | 27,7112 | -27,6843   | 5,57089          | 4,96945 | 94 |  |
| 1.25µM                   | 1,76004E-05 | 7,84621   | 33,0584 | -25,2122   | 5,57089          | 4,52569 | 94 |  |
| 0.6µM                    | 0,00025411  | 10,4875   | 29,6112 | -19,1237   | 5,02868          | 3,80292 | 94 |  |
| 10µM                     | 0,00161167  | 0,0147958 | 19,7139 | -19,6991   | 6,06482          | 3,24809 | 94 |  |
| <b>VX-970 vs.AZD6738</b> |             |           |         |            |                  |         |    |  |
| 0.3µM                    | 1,77106E-34 | 19,3363   | 93,2912 | -73,9548   | 3,80923          | 19,4147 | 93 |  |
| 0.15µM                   | 1,59325E-26 | 39,8454   | 96,9024 | -57,057    | 3,80923          | 14,9786 | 93 |  |
| 0.6µM                    | 9,00775E-25 | 10,4875   | 76,6699 | -66,1823   | 4,70221          | 14,0747 | 93 |  |
| 1.2µM                    | 8,24985E-08 | 7,84621   | 36,8809 | -29,0347   | 4,98745          | 5,82156 | 93 |  |

| Multiple t test##        |             |           |         |            |                  |         |    |  |
|--------------------------|-------------|-----------|---------|------------|------------------|---------|----|--|
| H929                     | P value     | Mean1     | Mean2   | Difference | SE of difference | t ratio | df |  |
| <b>VX-970 vs.VE-821</b>  |             |           |         |            |                  |         |    |  |
| 10µM                     | 1,41301E-10 | 0,0262067 | 56,1227 | -56,0965   | 7,46253          | 7,51708 | 70 |  |
| 1.2µM                    | 1,10063E-09 | 35,6946   | 81,773  | -46,0784   | 6,55442          | 7,03013 | 70 |  |
| 5µM                      | 4,76792E-08 | 23,4623   | 69,147  | -45,6847   | 7,46253          | 6,12187 | 70 |  |
| 2.5µM                    | 6,42024E-08 | 33,1412   | 76,3037 | -43,1625   | 7,13555          | 6,04894 | 70 |  |
| 0.6µM                    | 2,94059E-07 | 49,5049   | 83,0629 | -33,5581   | 5,91648          | 5,67196 | 70 |  |
| 0.3µM                    | 0,00185613  | 71,7572   | 92,5669 | -20,8097   | 6,4319           | 3,23538 | 70 |  |
| <b>VX-970 vs.AZD6738</b> |             |           |         |            |                  |         |    |  |
| 0.6µM                    | 1,34963E-09 | 49,5049   | 91,7987 | -42,2938   | 5,89187          | 7,17834 | 59 |  |
| 1.2µM                    | 5,93901E-09 | 35,6946   | 78,9569 | -43,2623   | 6,36395          | 6,79803 | 59 |  |
| 0.3µM                    | 8,77507E-05 | 71,7572   | 94,8607 | -23,1034   | 5,48503          | 4,21208 | 59 |  |
| 2.5µM                    | 0,000789056 | 33,1412   | 57,2223 | -24,0811   | 6,80335          | 3,53959 | 59 |  |

| Dunnett's multiple comparisons test# |           |                  |              |         |
|--------------------------------------|-----------|------------------|--------------|---------|
| <b>RPMI 8226</b>                     | Mean Diff | 95% CI of diff   | Significant? | Summary |
| <b>0µM</b>                           |           |                  |              |         |
| VX-970 vs.VE-821                     | 0         | -11,03 to 11,03  | No           | ns      |
| VX-970 vs.AZD6738                    | 0         | -9,846 to 9,846  | No           | ns      |
| <b>0.15µM</b>                        |           |                  |              |         |
| VX-970 vs.VE-821                     | -24,06    | -35,28 to -12,85 | Yes          | ****    |
| VX-970 vs.AZD6738                    | -45,66    | -56,87 to -34,44 | Yes          | ****    |
| <b>0.3µM</b>                         |           |                  |              |         |
| VX-970 vs.VE-821                     | -6,356    | -17,57 to 4,860  | No           | ns      |
| VX-970 vs.AZD6738                    | -79,1     | -90,31 to -67,88 | Yes          | ****    |
| <b>0.6µM</b>                         |           |                  |              |         |
| VX-970 vs.VE-821                     | -6,492    | -20,55 to 7,568  | No           | ns      |
| VX-970 vs.AZD6738                    | -69,8     | -83,86 to -55,74 | Yes          | ****    |
| <b>1.2µM</b>                         |           |                  |              |         |
| VX-970 vs.VE-821                     | -10,32    | -24,38 to 3,742  | No           | ns      |
| VX-970 vs.AZD6738                    | -19,3     | -33,36 to -5,242 | Yes          | **      |
| <b>2.5µM</b>                         |           |                  |              |         |
| VX-970 vs.VE-821                     | -13,52    | -27,58 to 0,5439 | No           | ns      |
| VX-970 vs.AZD6738                    | -5,171    | -19,23 to 8,889  | No           | ns      |
| <b>5µM</b>                           |           |                  |              |         |
| VX-970 vs.VE-821                     | -11,86    | -25,92 to 2,199  | No           | ns      |
| VX-970 vs.AZD6738                    | -2,865    | -16,93 to 11,19  | No           | ns      |
| <b>10µM</b>                          |           |                  |              |         |
| VX-970 vs.VE-821                     | -8,393    | -21,54 to 4,759  | No           | ns      |
| VX-970 vs.AZD6738                    | -2,562    | -15,71 to 10,59  | No           | ns      |

| Dunnett's multiple comparisons test# |           |                  |              |         |
|--------------------------------------|-----------|------------------|--------------|---------|
| <b>U266</b>                          | Mean Diff | 95% CI of diff   | Significant? | Summary |
| <b>0µM</b>                           |           |                  |              |         |
| VX-970 vs.VE-821                     | 0         | -9,951 to 9,951  | No           | ns      |
| VX-970 vs.AZD6738                    | 0         | -11,15 to 11,15  | No           | ns      |
| <b>0.15µM</b>                        |           |                  |              |         |
| VX-970 vs.VE-821                     | -16       | -27,23 to -4,764 | Yes          | **      |
| VX-970 vs.AZD6738                    | -18,76    | -30,00 to -7,530 | Yes          | ***     |
| <b>0.3µM</b>                         |           |                  |              |         |
| VX-970 vs.VE-821                     | -28,5     | -39,74 to -17,27 | Yes          | ****    |
| VX-970 vs.AZD6738                    | -43,08    | -54,31 to -31,84 | Yes          | ****    |
| <b>0.6µM</b>                         |           |                  |              |         |
| VX-970 vs.VE-821                     | -32,74    | -45,05 to -20,44 | Yes          | ****    |
| VX-970 vs.AZD6738                    | -60,31    | -72,62 to -48,01 | Yes          | ****    |
| <b>1.2µM</b>                         |           |                  |              |         |
| VX-970 vs.VE-821                     | -31,29    | -45,50 to -17,08 | Yes          | ****    |
| VX-970 vs.AZD6738                    | -49,96    | -64,18 to -35,75 | Yes          | ****    |
| <b>2.5µM</b>                         |           |                  |              |         |
| VX-970 vs.VE-821                     | -33,43    | -47,64 to -19,22 | Yes          | ****    |
| VX-970 vs.AZD6738                    | -26,61    | -40,83 to -12,40 | Yes          | ***     |
| <b>5µM</b>                           |           |                  |              |         |
| VX-970 vs.VE-821                     | -43,28    | -57,49 to -29,07 | Yes          | ****    |
| VX-970 vs.AZD6738                    | -25,09    | -39,30 to -10,88 | Yes          | ***     |
| <b>10µM</b>                          |           |                  |              |         |
| VX-970 vs.VE-821                     | -50,15    | -64,36 to -35,94 | Yes          | ****    |
| VX-970 vs.AZD6738                    | -30,07    | -44,29 to -15,86 | Yes          | ****    |

| Multiple t test##        |             |         |         |            |                  |         |    |  |  |
|--------------------------|-------------|---------|---------|------------|------------------|---------|----|--|--|
| <b>RPMI 8226</b>         | P value     | Mean1   | Mean2   | Difference | SE of difference | t ratio | df |  |  |
| <b>VX-970 vs.VE-821</b>  |             |         |         |            |                  |         |    |  |  |
| 0.15µM                   | 2,66557E-05 | 50,0105 | 74,0739 | -24,0634   | 5,28             | 4,55747 | 59 |  |  |
| <b>VX-970 vs.AZD6738</b> |             |         |         |            |                  |         |    |  |  |
| 0.3µM                    | 2,56731E-21 | 15,6963 | 94,7939 | -79,0976   | 5,44279          | 14,5325 | 60 |  |  |
| 0.6µM                    | 8,94622E-15 | 2,67292 | 72,4768 | -69,8039   | 6,8229           | 10,2308 | 60 |  |  |
| 0.15µM                   | 1,06866E-11 | 50,0105 | 95,6668 | -45,6563   | 5,44279          | 8,38841 | 60 |  |  |
| 1.25µM                   | 0,00634152  | 1,59807 | 20,8995 | -19,3015   | 6,8229           | 2,82893 | 60 |  |  |

| Multiple t test##        |             |           |         |            |                  |         |    |  |  |
|--------------------------|-------------|-----------|---------|------------|------------------|---------|----|--|--|
| <b>U266</b>              | P value     | Mean1     | Mean2   | Difference | SE of difference | t ratio | df |  |  |
| <b>VX-970 vs.VE-821</b>  |             |           |         |            |                  |         |    |  |  |
| 10µM                     | 1,04985E-13 | 39,8454   | 80,2478 | -40,4024   | 4,64241          | 8,70289 | 94 |  |  |
| 5µM                      | 2,1284E-08  | 19,3363   | 45,3818 | -26,0455   | 4,25484          | 6,12137 | 94 |  |  |
| 0.6µM                    | 1,08775E-06 | 4,7678    | 33,8223 | -29,0545   | 5,57089          | 5,21541 | 94 |  |  |
| 0.3µM                    | 3,00559E-06 | 0,0268766 | 27,7112 | -27,6843   | 5,57089          | 4,96945 | 94 |  |  |
| 2.5µM                    | 1,76004E-05 | 7,84621   | 33,0584 | -25,2122   | 5,57089          | 4,52569 | 94 |  |  |
| 1.25µM                   | 0,00025411  | 10,4875   | 29,6112 | -19,1237   | 5,02868          | 3,80292 | 94 |  |  |
| 0.15µM                   | 0,00161167  | 0,0147958 | 19,7139 | -19,6991   | 6,06482          | 3,24809 | 94 |  |  |
| <b>VX-970 vs.AZD6738</b> |             |           |         |            |                  |         |    |  |  |
| 0.6µM                    | 2,23922E-16 | 32,5544   | 92,8681 | -60,3138   | 5,46032          | 11,0458 | 63 |  |  |
| 0.3µM                    | 2,70822E-12 | 52,3848   | 95,4603 | -43,0755   | 4,98456          | 8,64177 | 63 |  |  |
| 1.25µM                   | 4,83381E-11 | 29,4229   | 79,3878 | -49,9649   | 6,30503          | 7,92461 | 63 |  |  |
| 10µM                     | 1,13172E-05 | 0,81522   | 30,8898 | -30,0746   | 6,30503          | 4,76994 | 63 |  |  |
| 2.5µM                    | 7,95189E-05 | 27,3965   | 54,011  | -26,6145   | 6,30503          | 4,22115 | 63 |  |  |
| 5µM                      | 0,000181072 | 13,3286   | 38,4199 | -25,0913   | 6,30503          | 3,97956 | 63 |  |  |
| 0.15µM                   | 0,000368874 | 79,0938   | 97,8587 | -18,7648   | 4,98456          | 3,76459 | 63 |  |  |

| Dunnett's multiple comparisons test# |           |                  |              |         |
|--------------------------------------|-----------|------------------|--------------|---------|
| LP1                                  | Mean Diff | 95% CI of diff   | Significant? | Summary |
| <b>0µM</b>                           |           |                  |              |         |
| VX-970 vs.VE-821                     | 0         | -12,33 to 12,33  | No           | ns      |
| VX-970 vs.AZD6738                    | 0         | -12,33 to 12,33  | No           | ns      |
| <b>0.15µM</b>                        |           |                  |              |         |
| VX-970 vs.VE-821                     | -16,13    | -28,61 to -3,640 | Yes          | **      |
| VX-970 vs.AZD6738                    | -16,52    | -29,01 to -4,038 | Yes          | **      |
| <b>0.3µM</b>                         |           |                  |              |         |
| VX-970 vs.VE-821                     | -14,94    | -27,42 to -2,450 | Yes          | *       |
| VX-970 vs.AZD6738                    | -32,67    | -45,16 to -20,19 | Yes          | ****    |
| <b>0.6µM</b>                         |           |                  |              |         |
| VX-970 vs.VE-821                     | -26,54    | -41,83 to -11,25 | Yes          | ***     |
| VX-970 vs.AZD6738                    | -52,45    | -67,74 to -37,16 | Yes          | ****    |
| <b>1.2µM</b>                         |           |                  |              |         |
| VX-970 vs.VE-821                     | -28,74    | -44,03 to -13,44 | Yes          | ***     |
| VX-970 vs.AZD6738                    | -25,14    | -40,43 to -9,843 | Yes          | ***     |
| <b>2.5µM</b>                         |           |                  |              |         |
| VX-970 vs.VE-821                     | -33,85    | -49,14 to -18,55 | Yes          | ****    |
| VX-970 vs.AZD6738                    | -8,637    | -23,93 to 6,657  | No           | ns      |
| <b>5µM</b>                           |           |                  |              |         |
| VX-970 vs.VE-821                     | -39,12    | -54,41 to -23,83 | Yes          | ****    |
| VX-970 vs.AZD6738                    | -11,88    | -27,17 to 3,414  | No           | ns      |
| <b>10µM</b>                          |           |                  |              |         |
| VX-970 vs.VE-821                     | -34,92    | -50,22 to -19,63 | Yes          | ****    |
| VX-970 vs.AZD6738                    | -8,526    | -23,82 to 6,767  | No           | ns      |

| Dunnett's multiple comparisons test# |           |                   |              |         |
|--------------------------------------|-----------|-------------------|--------------|---------|
| OPM2                                 | Mean Diff | 95% CI of diff    | Significant? | Summary |
| <b>0µM</b>                           |           |                   |              |         |
| VX-970 vs.VE-821                     | 0         | -13,54 to 13,54   | No           | ns      |
| VX-970 vs.AZD6738                    | 0         | -17,12 to 17,12   | No           | ns      |
| <b>0.15µM</b>                        |           |                   |              |         |
| VX-970 vs.VE-821                     | -11,31    | -29,04 to 6,412   | No           | ns      |
| VX-970 vs.AZD6738                    | -19,39    | -37,12 to -1,668  | Yes          | *       |
| <b>0.3µM</b>                         |           |                   |              |         |
| VX-970 vs.VE-821                     | -16,58    | -34,30 to 1,147   | No           | ns      |
| VX-970 vs.AZD6738                    | -53,26    | -70,98 to -35,53  | Yes          | ****    |
| <b>0.6µM</b>                         |           |                   |              |         |
| VX-970 vs.VE-821                     | -44,37    | -61,60 to -27,14  | Yes          | ****    |
| VX-970 vs.AZD6738                    | -68,79    | -88,41 to -49,18  | Yes          | ****    |
| <b>1.2µM</b>                         |           |                   |              |         |
| VX-970 vs.VE-821                     | -40,1     | -57,33 to -22,87  | Yes          | ****    |
| VX-970 vs.AZD6738                    | -40,33    | -59,94 to -20,71  | Yes          | ****    |
| <b>2.5µM</b>                         |           |                   |              |         |
| VX-970 vs.VE-821                     | -40,74    | -59,50 to -21,98  | Yes          | ****    |
| VX-970 vs.AZD6738                    | -21,42    | -42,39 to -0,4448 | Yes          | *       |
| <b>5µM</b>                           |           |                   |              |         |
| VX-970 vs.VE-821                     | -34,22    | -53,84 to -14,60  | Yes          | ***     |
| VX-970 vs.AZD6738                    | -18,01    | -38,98 to 2,960   | No           | ns      |
| <b>10µM</b>                          |           |                   |              |         |
| VX-970 vs.VE-821                     | -33,28    | -52,90 to -13,66  | Yes          | ***     |
| VX-970 vs.AZD6738                    | -24,53    | -45,50 to -3,559  | Yes          | *       |

| Multiple t test##        |             |         |         |            |                  |         |    |
|--------------------------|-------------|---------|---------|------------|------------------|---------|----|
| LP1                      | P value     | Mean1   | Mean2   | Difference | SE of difference | t ratio | df |
| <b>VX-970 vs.VE-821</b>  |             |         |         |            |                  |         |    |
| 5µM                      | 5,02977E-06 | 4,27118 | 43,391  | -39,1198   | 7,66914          | 5,10094 | 51 |
| 10µM                     | 3,30477E-05 | 3,6543  | 38,5763 | -34,922    | 7,66914          | 4,55358 | 51 |
| 2.5µM                    | 5,28966E-05 | 12,7423 | 46,5901 | -33,8478   | 7,66914          | 4,4135  | 51 |
| 1.25µM                   | 0,000457107 | 17,2604 | 45,996  | -28,7356   | 7,66914          | 3,74691 | 51 |
| 0.6µM                    | 0,00109878  | 26,502  | 53,0407 | -26,5387   | 7,66914          | 3,46046 | 51 |
| 0.15µM                   | 0,0129561   | 72,7038 | 88,8303 | -16,1265   | 6,26183          | 2,57536 | 51 |
| 0.3µM                    | 0,0208123   | 55,3816 | 70,3187 | -14,9371   | 6,26183          | 2,38542 | 51 |
| <b>VX-970 vs.AZD6738</b> |             |         |         |            |                  |         |    |
| 0.6µM                    | 6,21446E-09 | 26,502  | 78,9526 | -52,4506   | 7,53217          | 6,96354 | 51 |
| 0.3µM                    | 2,39179E-06 | 55,3816 | 88,0536 | -32,672    | 6,14999          | 5,31253 | 51 |
| 1.25µM                   | 0,00158553  | 17,2604 | 42,3966 | -25,1362   | 7,53217          | 3,33718 | 51 |
| 0.15µM                   | 0,00971127  | 72,7038 | 89,2284 | -16,5246   | 6,14999          | 2,68694 | 51 |

| Multiple t test##        |             |         |         |            |                  |         |    |
|--------------------------|-------------|---------|---------|------------|------------------|---------|----|
| OPM2                     | P value     | Mean1   | Mean2   | Difference | SE of difference | t ratio | df |
| <b>VX-970 vs.VE-821</b>  |             |         |         |            |                  |         |    |
| 0.6µM                    | 2,25056E-06 | 30,1569 | 74,5311 | -44,3741   | 8,46661          | 5,24107 | 59 |
| 1.25µM                   | 1,41093E-05 | 27,4725 | 67,5709 | -40,0984   | 8,46661          | 4,73606 | 59 |
| 2.5µM                    | 4,29146E-05 | 23,0739 | 63,8163 | -40,7424   | 9,21728          | 4,42022 | 59 |
| 5µM                      | 0,000763831 | 20,4447 | 54,6655 | -34,2208   | 9,63966          | 3,55    | 59 |
| 10µM                     | 0,00103316  | 5,48769 | 38,7698 | -33,2821   | 9,63966          | 3,45262 | 59 |
| <b>VX-970 vs.AZD6738</b> |             |         |         |            |                  |         |    |
| 0.6µM                    | 6,52957E-13 | 30,1569 | 98,9517 | -68,7948   | 7,08329          | 9,71226 | 48 |
| 0.3µM                    | 7,22128E-11 | 50,3407 | 103,598 | -53,2572   | 6,39981          | 8,32168 | 48 |
| 1.25µM                   | 7,35175E-07 | 27,4725 | 67,7988 | -40,3263   | 7,08329          | 5,69316 | 48 |
| 10µM                     | 0,00217653  | 5,48769 | 30,0184 | -24,5308   | 7,57236          | 3,23951 | 48 |
| 0.15µM                   | 0,00392937  | 83,5144 | 102,907 | -19,3927   | 6,39981          | 3,03021 | 48 |
| 2.5µM                    | 0,00680788  | 23,0739 | 44,4909 | -21,4169   | 7,57236          | 2,82831 | 48 |
| 5µM                      | 0,0214008   | 20,4447 | 38,457  | -18,0123   | 7,57236          | 2,37869 | 48 |

| Dunnett's multiple comparisons test# |           |                  |              |         |
|--------------------------------------|-----------|------------------|--------------|---------|
| KMS20                                | Mean Diff | 95% CI of diff   | Significant? | Summary |
| <b>0µM</b>                           |           |                  |              |         |
| VX-970 vs.VE-821                     | 0         | -11,35 to 11,35  | No           | ns      |
| VX-970 vs.AZD6738                    | 0         | -10,23 to 10,23  | No           | ns      |
| <b>0.15µM</b>                        |           |                  |              |         |
| VX-970 vs.VE-821                     | -20,6     | -31,95 to -9,259 | Yes          | ***     |
| VX-970 vs.AZD6738                    | -24,56    | -34,79 to -14,34 | Yes          | ****    |
| <b>0.3µM</b>                         |           |                  |              |         |
| VX-970 vs.VE-821                     | -33,76    | -45,11 to -22,42 | Yes          | ****    |
| VX-970 vs.AZD6738                    | -54,94    | -65,16 to -44,71 | Yes          | ****    |
| <b>0.6µM</b>                         |           |                  |              |         |
| VX-970 vs.VE-821                     | -37,35    | -51,25 to -23,46 | Yes          | ****    |
| VX-970 vs.AZD6738                    | -80,32    | -93,32 to -67,32 | Yes          | ****    |
| <b>1.2µM</b>                         |           |                  |              |         |
| VX-970 vs.VE-821                     | -46,35    | -60,24 to -32,45 | Yes          | ****    |
| VX-970 vs.AZD6738                    | -62,9     | -75,90 to -49,91 | Yes          | ****    |
| <b>2.5µM</b>                         |           |                  |              |         |
| VX-970 vs.VE-821                     | -64       | -77,89 to -50,10 | Yes          | ****    |
| VX-970 vs.AZD6738                    | -36,92    | -49,92 to -23,92 | Yes          | ****    |
| <b>5µM</b>                           |           |                  |              |         |
| VX-970 vs.VE-821                     | -59,03    | -72,92 to -45,13 | Yes          | ****    |
| VX-970 vs.AZD6738                    | -17,69    | -30,69 to -4,692 | Yes          | **      |
| <b>10µM</b>                          |           |                  |              |         |
| VX-970 vs.VE-821                     | -49,43    | -63,32 to -35,53 | Yes          | ****    |
| VX-970 vs.AZD6738                    | -12,77    | -25,77 to 0,2274 | No           | ns      |

| Multiple t test#         |             |           |         |            |                  |         |    |
|--------------------------|-------------|-----------|---------|------------|------------------|---------|----|
| KMS20                    | P value     | Mean1     | Mean2   | Difference | SE of difference | t ratio | df |
| <b>VX-970 vs.VE-821</b>  |             |           |         |            |                  |         |    |
| 2.5µM                    | 2,76632E-12 | 1,19025   | 65,1875 | -63,9973   | 6,98187          | 9,1662  | 50 |
| 5µM                      | 3,32802E-11 | 0,0957113 | 59,121  | -59,0253   | 6,98187          | 8,45408 | 50 |
| 10µM                     | 4,50361E-09 | 0,021346  | 49,4509 | -49,4295   | 6,98187          | 7,07969 | 50 |
| 1.25µM                   | 2,20876E-08 | 9,41481   | 55,763  | -46,3482   | 6,98187          | 6,63836 | 50 |
| 0.3µM                    | 2,88507E-07 | 48,0559   | 81,8195 | -33,7637   | 5,70068          | 5,92275 | 50 |
| 0.6µM                    | 2,19746E-06 | 17,3529   | 54,705  | -37,3521   | 6,98187          | 5,34987 | 50 |
| 0.15µM                   | 0,000698663 | 76,1872   | 96,7915 | -20,6043   | 5,70068          | 3,61436 | 50 |
| <b>VX-970 vs.AZD6738</b> |             |           |         |            |                  |         |    |
| 0.6µM                    | 6,52957E-13 | 30,1569   | 98,9517 | -68,7948   | 7,08329          | 9,71226 | 48 |
| 0.3µM                    | 7,22128E-11 | 50,3407   | 103,598 | -53,2572   | 6,39981          | 8,32168 | 48 |
| 1.25µM                   | 7,35175E-07 | 27,4725   | 67,7988 | -40,3263   | 7,08329          | 5,69316 | 48 |
| 2.5µM                    | 0,00217653  | 5,48769   | 30,0184 | -24,5308   | 7,57236          | 3,23951 | 48 |
| 0.15µM                   | 0,00392937  | 83,5144   | 102,907 | -19,3927   | 6,39981          | 3,03021 | 48 |
| 5µM                      | 0,00680788  | 23,0739   | 44,4909 | -21,4169   | 7,57236          | 2,82831 | 48 |



**Supplementary Table 2**

**Comparison of the effects of VX-970 alone or in combination with Melphalan in different MM cell lines using the GrapPad software**

# Statistical analysis was performed using two-way ANOVA followed by Dunnett correction for multiple comparisons.

## Multiple t tests were performed and statistical significance determined using the Holm-Sidak method, with alpha=5.000%. Only significant results are shown.

| Dunnett's multiple comparisons test# |           |                 |              |         |
|--------------------------------------|-----------|-----------------|--------------|---------|
| MM1.S                                | Mean Diff | 95% CI of diff  | Significant? | Summary |
| VX-970_0µM vs.VX-970_0.075µM         | 45,96     | 39,66 to 52,25  | Yes          | ****    |
| VX-970_0µM vs.VX-970_0.15µM          | 63,15     | 56,86 to 69,45  | Yes          | ****    |
| VX-970_0µM vs.VX-970_0.3µM           | 73,84     | 67,55 to 80,13  | Yes          | ****    |
| <b>VX-970_0µM</b>                    |           |                 |              |         |
| Melph_0µM vs. Melph_0.625µM          | 9,058     | -3,198 to 21,31 | No           | ns      |
| Melph_0µM vs. Melph_1.25µM           | 17,31     | 5,056 to 29,57  | Yes          | **      |
| Melph_0µM vs. Melph_2.5µM            | 44,46     | 32,20 to 56,72  | Yes          | ****    |
| <b>VX-970_0.075µM</b>                |           |                 |              |         |
| Melph_0µM vs. Melph_0.625µM          | 29,42     | 17,16 to 41,67  | Yes          | ****    |
| Melph_0µM vs. Melph_1.25µM           | 48,9      | 36,64 to 61,16  | Yes          | ****    |
| Melph_0µM vs. Melph_2.5µM            | 63,4      | 51,14 to 75,65  | Yes          | ****    |
| <b>VX-970_0.15µM</b>                 |           |                 |              |         |
| Melph_0µM vs. Melph_0.625µM          | 19,85     | 7,596 to 32,11  | Yes          | ***     |
| Melph_0µM vs. Melph_1.25µM           | 28,28     | 16,03 to 40,54  | Yes          | ****    |
| Melph_0µM vs. Melph_2.5µM            | 35,5      | 23,24 to 47,75  | Yes          | ****    |
| <b>VX-970_0.3µM</b>                  |           |                 |              |         |
| Melph_0µM vs. Melph_0.625µM          | 7,726     | -4,530 to 19,98 | No           | ns      |
| Melph_0µM vs. Melph_1.25µM           | 12,61     | 0,3501 to 24,86 | Yes          | *       |
| Melph_0µM vs. Melph_2.5µM            | 16,17     | 3,912 to 28,42  | Yes          | **      |

| Dunnett's multiple comparisons test# |           |                 |              |         |
|--------------------------------------|-----------|-----------------|--------------|---------|
| H929                                 | Mean Diff | 95% CI of diff  | Significant? | Summary |
| VX-970_0µM vs.VX-970_0.075µM         | 13,97     | 5,429 to 22,51  | Yes          | ***     |
| VX-970_0µM vs.VX-970_0.15µM          | 21,06     | 12,51 to 29,60  | Yes          | ****    |
| VX-970_0µM vs.VX-970_0.3µM           | 33,95     | 25,41 to 42,49  | Yes          | ****    |
| <b>VX-970_0µM</b>                    |           |                 |              |         |
| Melph_0µM vs. Melph_0.625µM          | 2,954     | -15,23 to 21,14 | No           | ns      |
| Melph_0µM vs. Melph_1.25µM           | 13,34     | -2,405 to 29,09 | No           | ns      |
| Melph_0µM vs. Melph_2.5µM            | 30        | 13,30 to 46,71  | Yes          | ***     |
| <b>VX-970_0.075µM</b>                |           |                 |              |         |
| Melph_0µM vs. Melph_0.625µM          | 23,43     | 5,248 to 41,62  | Yes          | **      |
| Melph_0µM vs. Melph_1.25µM           | 31,93     | 16,18 to 47,68  | Yes          | ****    |
| Melph_0µM vs. Melph_2.5µM            | 53,17     | 36,47 to 69,88  | Yes          | ****    |
| <b>VX-970_0.15µM</b>                 |           |                 |              |         |
| Melph_0µM vs. Melph_0.625µM          | 31,51     | 13,32 to 49,69  | Yes          | ***     |
| Melph_0µM vs. Melph_1.25µM           | 33,7      | 17,95 to 49,45  | Yes          | ****    |
| Melph_0µM vs. Melph_2.5µM            | 48,35     | 31,65 to 65,05  | Yes          | ****    |
| <b>VX-970_0.3µM</b>                  |           |                 |              |         |
| Melph_0µM vs. Melph_0.625µM          | 27,65     | 9,462 to 45,83  | Yes          | **      |
| Melph_0µM vs. Melph_1.25µM           | 26,78     | 11,03 to 42,53  | Yes          | ***     |
| Melph_0µM vs. Melph_2.5µM            | 36,21     | 19,51 to 52,92  | Yes          | ****    |

| Multiple t test##                  |             |         |         |            |                  |         |    |
|------------------------------------|-------------|---------|---------|------------|------------------|---------|----|
| MM1.S                              | P value     | Mean1   | Mean2   | Difference | SE of difference | t ratio | df |
| <b>Melph_0µM vs. Melph_0.625µM</b> |             |         |         |            |                  |         |    |
| VX-970_0.075µM                     | 2,51258E-06 | 70,4036 | 40,9868 | 29,4168    | 4,53318          | 6,48922 | 20 |
| VX-970_0.15µM                      | 0,000290038 | 39,8013 | 19,9501 | 19,8512    | 4,53318          | 4,37908 | 20 |
| <b>Melph_0µM vs. Melph_1.25µM</b>  |             |         |         |            |                  |         |    |
| VX-970_0.075µM                     | 5,32075E-09 | 70,4036 | 21,5032 | 48,9004    | 5,04435          | 9,69409 | 20 |
| VX-970_0.15µM                      | 1,73255E-05 | 39,8013 | 11,5185 | 28,2828    | 5,04435          | 5,60682 | 20 |
| VX-970_0µM                         | 0,00264031  | 99,9999 | 82,6887 | 17,3112    | 5,04435          | 3,4318  | 20 |
| VX-970_0.3µM                       | 0,0212806   | 18,2371 | 5,63147 | 12,6057    | 5,04435          | 2,49896 | 20 |
| <b>Melph_0µM vs. Melph_2.5µM</b>   |             |         |         |            |                  |         |    |
| VX-970_0.075µM                     | 3,4225E-10  | 70,4036 | 7,00439 | 63,3992    | 5,56846          | 11,3854 | 20 |
| VX-970_0µM                         | 1,2019E-07  | 99,9999 | 55,5405 | 44,4595    | 5,56846          | 7,98416 | 20 |
| VX-970_0.15µM                      | 3,20799E-06 | 39,8013 | 4,30194 | 35,4993    | 5,56846          | 6,37507 | 20 |
| VX-970_0.3µM                       | 0,00878786  | 18,2371 | 2,06987 | 16,1673    | 5,56846          | 2,90336 | 20 |

| Multiple t test##                  |             |         |         |            |                  |         |    |
|------------------------------------|-------------|---------|---------|------------|------------------|---------|----|
| H929                               | P value     | Mean1   | Mean2   | Difference | SE of difference | t ratio | df |
| <b>Melph_0µM vs. Melph_0.625µM</b> |             |         |         |            |                  |         |    |
| VX-970_0.15µM                      | 3,49867E-08 | 94,2863 | 62,7808 | 31,5055    | 3,96123          | 7,95348 | 24 |
| VX-970_0.3µM                       | 3,2329E-07  | 75,8187 | 48,1715 | 27,6473    | 3,96123          | 6,97946 | 24 |
| VX-970_0.075µM                     | 4,19449E-06 | 100,562 | 77,1294 | 23,4331    | 3,96123          | 5,91562 | 24 |
| <b>Melph_0µM vs. Melph_1.25µM</b>  |             |         |         |            |                  |         |    |
| VX-970_0.15µM                      | 2,4252E-06  | 94,2863 | 60,59   | 33,6964    | 5,88807          | 5,72282 | 32 |
| VX-970_0.075µM                     | 5,80061E-06 | 100,562 | 68,6311 | 31,9314    | 5,88807          | 5,42307 | 32 |
| VX-970_0.3µM                       | 7,35922E-05 | 75,8187 | 49,0413 | 26,7774    | 5,88807          | 4,54773 | 32 |
| VX-970_0µM                         | 0,030338    | 100     | 86,6564 | 13,3436    | 5,88807          | 2,2662  | 32 |
| <b>Melph_0µM vs. Melph_2.5µM</b>   |             |         |         |            |                  |         |    |
| VX-970_0.075µM                     | 1,14096E-08 | 100,562 | 47,3879 | 53,1746    | 6,68022          | 7,96001 | 28 |
| VX-970_0.15µM                      | 7,04272E-08 | 94,2863 | 45,9363 | 48,35      | 6,68022          | 7,23779 | 28 |
| VX-970_0.3µM                       | 8,78796E-06 | 75,8187 | 39,6062 | 36,2125    | 6,68022          | 5,42085 | 28 |
| VX-970_0µM                         | 0,00011124  | 100     | 69,9967 | 30,0033    | 6,68022          | 4,49137 | 28 |

| Dunnett's multiple comparisons test# |           |                 |              |         |
|--------------------------------------|-----------|-----------------|--------------|---------|
| <b>KMS20</b>                         | Mean Diff | 95% CI of diff  | Significant? | Summary |
| VX-970_0µM vs.VX-970_0.075µM         | 20,76     | 8,997 to 32,52  | Yes          | ***     |
| VX-970_0µM vs.VX-970_0.15µM          | 38,34     | 26,58 to 50,10  | Yes          | ****    |
| VX-970_0µM vs.VX-970_0.3µM           | 62,87     | 51,11 to 74,63  | Yes          | ****    |
| <b>VX-970_0µM</b>                    |           |                 |              |         |
| Melph_0µM vs. Melph_1.25µM           | -1,606    | -25,27 to 22,06 | No           | ns      |
| Melph_0µM vs. Melph_2.5µM            | 1,242     | -21,07 to 23,56 | No           | ns      |
| Melph_0µM vs. Melph_5µM              | 28,31     | 4,637 to 51,97  | Yes          | *       |
| <b>VX-970_0.075µM</b>                |           |                 |              |         |
| Melph_0µM vs. Melph_1.25µM           | 3,543     | -20,13 to 27,21 | No           | ns      |
| Melph_0µM vs. Melph_2.5µM            | 16,49     | -5,827 to 38,80 | No           | ns      |
| Melph_0µM vs. Melph_5µM              | 48,7      | 25,03 to 72,37  | Yes          | ****    |
| <b>VX-970_0.15µM</b>                 |           |                 |              |         |
| Melph_0µM vs. Melph_1.25µM           | 9,366     | -14,30 to 33,03 | No           | ns      |
| Melph_0µM vs. Melph_2.5µM            | 19,14     | -3,173 to 41,46 | No           | ns      |
| Melph_0µM vs. Melph_5µM              | 44,63     | 20,97 to 68,30  | Yes          | ****    |
| <b>VX-970_0.3µM</b>                  |           |                 |              |         |
| Melph_0µM vs. Melph_1.25µM           | 7,127     | -16,54 to 30,80 | No           | ns      |
| Melph_0µM vs. Melph_2.5µM            | 15,95     | -6,365 to 38,26 | No           | ns      |
| Melph_0µM vs. Melph_5µM              | 25,38     | 1,717 to 49,05  | Yes          | *       |

| Dunnett's multiple comparisons test# |           |                 |              |         |
|--------------------------------------|-----------|-----------------|--------------|---------|
| <b>RPMI 8226</b>                     | Mean Diff | 95% CI of diff  | Significant? | Summary |
| VX-970_0µM vs.VX-970_0.075µM         | 26,53     | 20,24 to 32,82  | Yes          | ****    |
| VX-970_0µM vs.VX-970_0.15µM          | 62,99     | 56,70 to 69,28  | Yes          | ****    |
| VX-970_0µM vs.VX-970_0.3µM           | 88,04     | 81,75 to 94,33  | Yes          | ****    |
| <b>VX-970_0µM</b>                    |           |                 |              |         |
| Melph_0µM vs. Melph_1.25µM           | -0,5573   | -12,81 to 11,70 | No           | ns      |
| Melph_0µM vs. Melph_2.5µM            | 0,8412    | -11,41 to 13,09 | No           | ns      |
| Melph_0µM vs. Melph_5µM              | 6,245     | -6,008 to 18,50 | No           | ns      |
| <b>VX-970_0.075µM</b>                |           |                 |              |         |
| Melph_0µM vs. Melph_1.25µM           | 24,05     | 11,79 to 36,30  | Yes          | ****    |
| Melph_0µM vs. Melph_2.5µM            | 28,5      | 16,24 to 40,75  | Yes          | ****    |
| Melph_0µM vs. Melph_5µM              | 26,01     | 13,75 to 38,26  | Yes          | ****    |
| <b>VX-970_0.15µM</b>                 |           |                 |              |         |
| Melph_0µM vs. Melph_1.25µM           | 23,86     | 11,61 to 36,11  | Yes          | ****    |
| Melph_0µM vs. Melph_2.5µM            | 20,92     | 8,665 to 33,17  | Yes          | ***     |
| Melph_0µM vs. Melph_5µM              | 16,09     | 3,834 to 28,34  | Yes          | **      |
| <b>VX-970_0.3µM</b>                  |           |                 |              |         |
| Melph_0µM vs. Melph_1.25µM           | 5         | -7,253 to 17,25 | No           | ns      |
| Melph_0µM vs. Melph_2.5µM            | 4,564     | -7,689 to 16,82 | No           | ns      |
| Melph_0µM vs. Melph_5µM              | 5,063     | -7,191 to 17,32 | No           | ns      |

| Multiple t test##              |             |         |         |            |                  |         |    |
|--------------------------------|-------------|---------|---------|------------|------------------|---------|----|
| <b>KMS20</b>                   | P value     | Mean1   | Mean2   | Difference | SE of difference | t ratio | df |
| <b>Melph_0µM vs. Melph_5µM</b> |             |         |         |            |                  |         |    |
| VX-970_0.075µM                 | 0,00017278  | 89,1531 | 40,4551 | 48,698     | 11,2483          | 4,32937 | 28 |
| VX-970_0.15µM                  | 0,000457728 | 72,7007 | 28,0666 | 44,6341    | 11,2483          | 3,96808 | 28 |
| VX-970_0µM                     | 0,0178635   | 99,9998 | 71,6943 | 28,3055    | 11,2483          | 2,51643 | 28 |
| VX-970_0.3µM                   | 0,0320154   | 42,5073 | 17,1225 | 25,3849    | 11,2483          | 2,25677 | 28 |

| Multiple t test##                 |             |         |         |            |                  |         |    |
|-----------------------------------|-------------|---------|---------|------------|------------------|---------|----|
| <b>RPMI 8226</b>                  | P value     | Mean1   | Mean2   | Difference | SE of difference | t ratio | df |
| <b>Melph_0µM vs. Melph_1.25µM</b> |             |         |         |            |                  |         |    |
| VX-970_0.075µM                    | 3,79527E-07 | 90,0912 | 66,0443 | 24,0469    | 3,24907          | 7,40115 | 20 |
| VX-970_0.15µM                     | 4,26352E-07 | 49,5485 | 25,6892 | 23,8593    | 3,24907          | 7,34343 | 20 |
| <b>Melph_0µM vs. Melph_2.5µM</b>  |             |         |         |            |                  |         |    |
| VX-970_0.075µM                    | 3,46019E-06 | 90,0912 | 61,5952 | 28,496     | 4,49473          | 6,33987 | 20 |
| VX-970_0.15µM                     | 0,000152913 | 49,5485 | 28,6301 | 20,9183    | 4,49473          | 4,65397 | 20 |
| <b>Melph_0µM vs. Melph_5µM</b>    |             |         |         |            |                  |         |    |
| VX-970_0.075µM                    | 2,43033E-05 | 90,0912 | 64,0847 | 26,0065    | 4,76633          | 5,45629 | 20 |
| VX-970_0.15µM                     | 0,00300833  | 49,5485 | 33,461  | 16,0874    | 4,76633          | 3,37522 | 20 |

| Dunnett's multiple comparisons test# |           |                 |              |         |
|--------------------------------------|-----------|-----------------|--------------|---------|
| LP1                                  | Mean Diff | 95% CI of diff  | Significant? | Summary |
| VX-970_0µM vs.VX-970_0.075µM         | 5,814     | -3,214 to 14,84 | No           | ns      |
| VX-970_0µM vs.VX-970_0.15µM          | 21,36     | 12,33 to 30,39  | Yes          | ****    |
| VX-970_0µM vs.VX-970_0.3µM           | 40,99     | 31,96 to 50,02  | Yes          | ****    |
| <b>VX-970_0µM</b>                    |           |                 |              |         |
| Melph_0µM vs. Melph_2.5µM            | 1,221     | -17,39 to 19,83 | No           | ns      |
| Melph_0µM vs. Melph_5µM              | -3,774    | -20,76 to 13,22 | No           | ns      |
| Melph_0µM vs. Melph_10µM             | -3,959    | -20,95 to 13,03 | No           | ns      |
| <b>VX-970_0.075µM</b>                |           |                 |              |         |
| Melph_0µM vs. Melph_2.5µM            | 4,175     | -14,44 to 22,79 | No           | ns      |
| Melph_0µM vs. Melph_5µM              | -3,037    | -20,03 to 13,95 | No           | ns      |
| Melph_0µM vs. Melph_10µM             | -4,063    | -21,05 to 12,93 | No           | ns      |
| <b>VX-970_0.15µM</b>                 |           |                 |              |         |
| Melph_0µM vs. Melph_2.5µM            | 7,851     | -10,76 to 26,46 | No           | ns      |
| Melph_0µM vs. Melph_5µM              | -1,785    | -18,78 to 15,20 | No           | ns      |
| Melph_0µM vs. Melph_10µM             | 6,754     | -10,24 to 23,74 | No           | ns      |
| <b>VX-970_0.3µM</b>                  |           |                 |              |         |
| Melph_0µM vs. Melph_2.5µM            | 11,83     | -6,779 to 30,44 | No           | ns      |
| Melph_0µM vs. Melph_5µM              | -1,327    | -18,32 to 15,66 | No           | ns      |
| Melph_0µM vs. Melph_10µM             | 12,09     | -4,896 to 29,08 | No           | ns      |

| Multiple t test##                       |
|-----------------------------------------|
| LP1                                     |
| not significant for all the comparisons |

| Dunnett's multiple comparisons test# |           |                 |              |         |
|--------------------------------------|-----------|-----------------|--------------|---------|
| OPM2                                 | Mean Diff | 95% CI of diff  | Significant? | Summary |
| VX-970_0µM vs.VX-970_0.075µM         | 8,931     | -1,417 to 19,28 | No           | ns      |
| VX-970_0µM vs.VX-970_0.15µM          | 22        | 11,65 to 32,35  | Yes          | ****    |
| VX-970_0µM vs.VX-970_0.3µM           | 55,66     | 45,31 to 66,00  | Yes          | ****    |
| <b>VX-970_0µM</b>                    |           |                 |              |         |
| Melph_0µM vs. Melph_2.5µM            | -1,05     | -21,04 to 18,94 | No           | ns      |
| Melph_0µM vs. Melph_5µM              | -4,604    | -24,60 to 15,39 | No           | ns      |
| Melph_0µM vs. Melph_10µM             | 21,95     | 1,957 to 41,95  | Yes          | *       |
| <b>VX-970_0.075µM</b>                |           |                 |              |         |
| Melph_0µM vs. Melph_2.5µM            | 7,943     | -12,05 to 27,94 | No           | ns      |
| Melph_0µM vs. Melph_5µM              | -0,4123   | -20,41 to 19,58 | No           | ns      |
| Melph_0µM vs. Melph_10µM             | 34,81     | 14,81 to 54,80  | Yes          | ***     |
| <b>VX-970_0.15µM</b>                 |           |                 |              |         |
| Melph_0µM vs. Melph_2.5µM            | 5,874     | -14,12 to 25,87 | No           | ns      |
| Melph_0µM vs. Melph_5µM              | -0,3564   | -20,35 to 19,64 | No           | ns      |
| Melph_0µM vs. Melph_10µM             | 28,4      | 8,410 to 48,40  | Yes          | **      |
| <b>VX-970_0.3µM</b>                  |           |                 |              |         |
| Melph_0µM vs. Melph_2.5µM            | 2,097     | -17,90 to 22,09 | No           | ns      |
| Melph_0µM vs. Melph_5µM              | 1,625     | -18,37 to 21,62 | No           | ns      |
| Melph_0µM vs. Melph_10µM             | 28,24     | 8,241 to 48,23  | Yes          | **      |

| Multiple t test##               | P value    | Mean1   | Mean2   | Difference | SE of difference | t ratio | df |
|---------------------------------|------------|---------|---------|------------|------------------|---------|----|
| <b>OPM2</b>                     |            |         |         |            |                  |         |    |
| <b>Melph_0µM vs. Melph_10µM</b> |            |         |         |            |                  |         |    |
| VX-970_0.075µM                  | 0,00179491 | 96,649  | 61,8409 | 34,808     | 9,91528          | 3,51055 | 24 |
| VX-970_0.15µM                   | 0,00853805 | 81,7755 | 53,3709 | 28,4046    | 9,91528          | 2,86473 | 24 |
| VX-970_0.3µM                    | 0,00888498 | 47,7005 | 19,4648 | 28,2357    | 9,91528          | 2,8477  | 24 |
| VX-970_0µM                      | 0,0365891  | 100     | 78,0489 | 21,9511    | 9,91528          | 2,21387 | 24 |

| Dunnett's multiple comparisons test# |           |                 |              |         |
|--------------------------------------|-----------|-----------------|--------------|---------|
| U266                                 | Mean Diff | 95% CI of diff  | Significant? | Summary |
| VX-970_0µM vs.VX-970_0.075µM         | 28,72     | 20,74 to 36,70  | Yes          | ****    |
| VX-970_0µM vs.VX-970_0.15µM          | 41,38     | 33,40 to 49,36  | Yes          | ****    |
| VX-970_0µM vs.VX-970_0.3µM           | 57,5      | 49,52 to 65,48  | Yes          | ****    |
| <b>VX-970_0µM</b>                    |           |                 |              |         |
| Melph_0µM vs. Melph_1.25µM           | 2,504     | -11,58 to 16,59 | No           | ns      |
| Melph_0µM vs. Melph_2.5µM            | 6,102     | -10,35 to 22,55 | No           | ns      |
| Melph_0µM vs. Melph_5µM              | 8,269     | -8,181 to 24,72 | No           | ns      |
| <b>VX-970_0.075µM</b>                |           |                 |              |         |
| Melph_0µM vs. Melph_1.25µM           | 29,58     | 15,49 to 43,67  | Yes          | ****    |
| Melph_0µM vs. Melph_2.5µM            | 47,55     | 31,10 to 64,00  | Yes          | ****    |
| Melph_0µM vs. Melph_5µM              | 58,98     | 42,53 to 75,43  | Yes          | ****    |
| <b>VX-970_0.15µM</b>                 |           |                 |              |         |
| Melph_0µM vs. Melph_1.25µM           | 26,65     | 12,56 to 40,73  | Yes          | ****    |
| Melph_0µM vs. Melph_2.5µM            | 43,47     | 27,02 to 59,92  | Yes          | ****    |
| Melph_0µM vs. Melph_5µM              | 54,79     | 38,34 to 71,24  | Yes          | ****    |
| <b>VX-970_0.3µM</b>                  |           |                 |              |         |
| Melph_0µM vs. Melph_1.25µM           | 22,81     | 8,723 to 36,90  | Yes          | ***     |
| Melph_0µM vs. Melph_2.5µM            | 30,6      | 14,15 to 47,05  | Yes          | ***     |
| Melph_0µM vs. Melph_5µM              | 38,34     | 21,89 to 54,79  | Yes          | ****    |

| Multiple t test##                 |             |         |         |            |                  |         |    |
|-----------------------------------|-------------|---------|---------|------------|------------------|---------|----|
| U266                              | P value     | Mean1   | Mean2   | Difference | SE of difference | t ratio | df |
| <b>Melph_0µM vs. Melph_1.25µM</b> |             |         |         |            |                  |         |    |
| VX-970_0.075µM                    | 6,88764E-06 | 95,5053 | 65,9264 | 29,5789    | 5,62917          | 5,25457 | 36 |
| VX-970_0.15µM                     | 3,37968E-05 | 80,5295 | 53,8824 | 26,6471    | 5,62917          | 4,73376 | 36 |
| VX-970_0.3µM                      | 0,000258862 | 58,1051 | 35,295  | 22,8101    | 5,62917          | 4,05213 | 36 |
| <b>Melph_0µM vs. Melph_2.5µM</b>  |             |         |         |            |                  |         |    |
| VX-970_0.075µM                    | 5,01546E-08 | 95,5053 | 47,9577 | 47,5476    | 6,451            | 7,37057 | 28 |
| VX-970_0.15µM                     | 2,56736E-07 | 80,5295 | 37,0559 | 43,4736    | 6,451            | 6,73905 | 28 |
| VX-970_0.3µM                      | 5,58421E-05 | 58,1051 | 27,5017 | 30,6035    | 6,451            | 4,74398 | 28 |
| <b>Melph_0µM vs. Melph_5µM</b>    |             |         |         |            |                  |         |    |
| VX-970_0.075µM                    | 9,16051E-15 | 95,5053 | 36,5215 | 58,9838    | 3,98601          | 14,7977 | 28 |
| VX-970_0.15µM                     | 5,67874E-14 | 80,5295 | 25,7418 | 54,7877    | 3,98601          | 13,745  | 28 |
| VX-970_0.3µM                      | 2,2561E-10  | 58,1051 | 19,7662 | 38,3389    | 3,98601          | 9,61836 | 28 |
| VX-970_0µM                        | 0,047328    | 100     | 91,7305 | 8,26947    | 3,98601          | 2,07462 | 28 |

**Supplementary Table 3**

**Comparison of the effects of KU-55933 alone or in combination with Doxorubicin in different MM cell lines using the GrapPad software**

# Statistical analysis was performed using 2 way ANOVA followed by Dunnett correction for multiple comparisons.

## Multiple t tests were performed and statistical significance determined using the Holm-Sidak method, with alpha=5.000% Only significant results are shown.

| Dunnett's multiple comparisons test# |           |                 |              |         |
|--------------------------------------|-----------|-----------------|--------------|---------|
| MM1.S                                | Mean Diff | 95% CI of diff  | Significant? | Summary |
| KU_0µM vs. KU_5µM                    | 12,11     | 1,344 to 22,88  | Yes          | *       |
| KU_0µM vs. KU_10µM                   | 45,9      | 35,13 to 56,67  | Yes          | ****    |
| <b>KU_0µM</b>                        |           |                 |              |         |
| Doxo_0nM vs. Doxo_10nM               | 5,547     | -13,11 to 24,20 | No           | ns      |
| Doxo_0nM vs. Doxo_20nM               | 23,96     | 5,306 to 42,61  | Yes          | *       |
| <b>KU_5µM</b>                        |           |                 |              |         |
| Doxo_0nM vs. Doxo_10nM               | 5,118     | -13,54 to 23,77 | No           | ns      |
| Doxo_0nM vs. Doxo_20nM               | 19,77     | 1,120 to 38,43  | Yes          | *       |
| <b>KU_10µM</b>                       |           |                 |              |         |
| Doxo_0nM vs. Doxo_10nM               | 12,08     | -6,572 to 30,73 | No           | ns      |
| Doxo_0nM vs. Doxo_20nM               | 26,56     | 7,903 to 45,21  | Yes          | **      |

| Dunnett's multiple comparisons test# |           |                   |              |         |
|--------------------------------------|-----------|-------------------|--------------|---------|
| H929                                 | Mean Diff | 95% CI of diff    | Significant? | Summary |
| KU_0µM vs. KU_5µM                    | 5,899     | -0,05575 to 11,88 | No           | ns      |
| KU_0µM vs. KU_10µM                   | 15,48     | 9,521 to 21,43    | Yes          | ****    |
| <b>KU_0µM</b>                        |           |                   |              |         |
| Doxo_0nM vs. Doxo_40nM               | 17,22     | 6,908 to 27,53    | Yes          | **      |
| Doxo_0nM vs. Doxo_80nM               | 52,37     | 42,06 to 62,69    | Yes          | ****    |
| <b>KU_5µM</b>                        |           |                   |              |         |
| Doxo_0nM vs. Doxo_40nM               | 11,68     | 1,371 to 22,00    | Yes          | *       |
| Doxo_0nM vs. Doxo_80nM               | 48,31     | 37,99 to 58,62    | Yes          | ****    |
| <b>KU_10µM</b>                       |           |                   |              |         |
| Doxo_0nM vs. Doxo_40nM               | 11,7      | 1,383 to 22,01    | Yes          | *       |
| Doxo_0nM vs. Doxo_80nM               | 38,57     | 28,25 to 48,88    | Yes          | ****    |

| Dunnett's multiple comparisons test# |           |                 |              |         |
|--------------------------------------|-----------|-----------------|--------------|---------|
| KMS20                                | Mean Diff | 95% CI of diff  | Significant? | Summary |
| KU_0µM vs. KU_5µM                    | 12,51     | -2,915 to 27,93 | No           | ns      |
| KU_0µM vs. KU_10µM                   | 23,02     | 7,593 to 38,44  | Yes          | **      |
| <b>KU_0µM</b>                        |           |                 |              |         |
| Doxo_0nM vs. Doxo_80nM               | 18,08     | -13,45 to 49,60 | No           | ns      |
| Doxo_0nM vs. Doxo_160nM              | 52,31     | 18,27 to 86,36  | Yes          | **      |
| <b>KU_5µM</b>                        |           |                 |              |         |
| Doxo_0nM vs. Doxo_80nM               | 18,46     | -13,06 to 49,99 | No           | ns      |
| Doxo_0nM vs. Doxo_160nM              | 48,2      | 14,16 to 82,25  | Yes          | **      |
| <b>KU_10µM</b>                       |           |                 |              |         |
| Doxo_0nM vs. Doxo_80nM               | 12,3      | -19,22 to 43,82 | No           | ns      |
| Doxo_0nM vs. Doxo_160nM              | 39,4      | 5,351 to 73,45  | Yes          | *       |

| Multiple t test##             |           |         |         |            |                  |         |    |
|-------------------------------|-----------|---------|---------|------------|------------------|---------|----|
| MM1.S                         | P value   | Mean1   | Mean2   | Difference | SE of difference | t ratio | df |
| <b>Doxo_0nM vs. Doxo_20nM</b> |           |         |         |            |                  |         |    |
| KU_10µM                       | 0,0143944 | 57,1397 | 30,5828 | 26,5569    | 9,29056          | 2,85848 | 12 |
| KU_0µM                        | 0,024146  | 100     | 76,0404 | 23,9595    | 9,29056          | 2,57891 | 12 |

| Multiple t test##             |             |         |         |            |                  |         |    |
|-------------------------------|-------------|---------|---------|------------|------------------|---------|----|
| H929                          | P value     | Mean1   | Mean2   | Difference | SE of difference | t ratio | df |
| <b>Doxo_0nM vs. Doxo_40nM</b> |             |         |         |            |                  |         |    |
| KU_0µM                        | 1,04957E-05 | 100     | 82,7787 | 17,2213    | 2,38347          | 7,22532 | 12 |
| KU_10µM                       | 0,000361341 | 78,0805 | 66,3836 | 11,6969    | 2,38347          | 4,9075  | 12 |
| KU_5µM                        | 0,000364523 | 90,8992 | 79,2147 | 11,6845    | 2,38347          | 4,90231 | 12 |
| <b>Doxo_0nM vs. Doxo_80nM</b> |             |         |         |            |                  |         |    |
| KU_0µM                        | 1,784E-07   | 100     | 47,6252 | 52,3748    | 4,91228          | 10,662  | 12 |
| KU_5µM                        | 4,29185E-07 | 90,8992 | 42,5938 | 48,3054    | 4,91228          | 9,83361 | 12 |
| KU_10µM                       | 4,5548E-06  | 78,0805 | 39,5136 | 38,5669    | 4,91228          | 7,85112 | 12 |

| Multiple t test##              |            |         |         |            |                  |         |    |
|--------------------------------|------------|---------|---------|------------|------------------|---------|----|
| KMS20                          | P value    | Mean1   | Mean2   | Difference | SE of difference | t ratio | df |
| <b>Doxo_0nM vs. Doxo_160nM</b> |            |         |         |            |                  |         |    |
| KU_0µM                         | 0,00461973 | 100     | 47,6856 | 52,3144    | 15,7355          | 3,32461 | 15 |
| KU_5µM                         | 0,0078854  | 85,2294 | 37,0258 | 48,2036    | 15,7355          | 3,06337 | 15 |
| KU_10µM                        | 0,0243195  | 70,1094 | 30,7099 | 39,3995    | 15,7355          | 2,50386 | 15 |

| Dunnett's multiple comparisons test# |           |                 |              |         |
|--------------------------------------|-----------|-----------------|--------------|---------|
| RPMI 8226                            |           |                 |              |         |
|                                      | Mean Diff | 95% CI of diff  | Significant? | Summary |
| KU_0µM vs. KU_5µM                    | 9,667     | -2,993 to 22,33 | No           | ns      |
| KU_0µM vs. KU_10µM                   | 15,58     | 2,916 to 28,24  | Yes          | *       |
| <b>KU_0µM</b>                        |           |                 |              |         |
| Doxo_0nM vs. Doxo_80nM               | 26,09     | 0,8410 to 51,34 | Yes          | *       |
| Doxo_0nM vs. Doxo_160nM              | 46,5      | 19,23 to 73,77  | Yes          | ***     |
| <b>KU_5µM</b>                        |           |                 |              |         |
| Doxo_0nM vs. Doxo_80nM               | 21,4      | -3,852 to 46,64 | No           | ns      |
| Doxo_0nM vs. Doxo_160nM              | 50,45     | 23,18 to 77,72  | Yes          | ***     |
| <b>KU_10µM</b>                       |           |                 |              |         |
| Doxo_0nM vs. Doxo_80nM               | 19,76     | -5,485 to 45,01 | No           | ns      |
| Doxo_0nM vs. Doxo_160nM              | 49,69     | 22,42 to 76,96  | Yes          | ***     |

| Dunnett's multiple comparisons test# |           |                 |              |         |
|--------------------------------------|-----------|-----------------|--------------|---------|
| LP1                                  |           |                 |              |         |
|                                      | Mean Diff | 95% CI of diff  | Significant? | Summary |
| KU_0µM vs. KU_5µM                    | 10,16     | 4,753 to 15,56  | Yes          | ***     |
| KU_0µM vs. KU_10µM                   | 24,55     | 19,15 to 29,96  | Yes          | ****    |
| <b>KU_0µM</b>                        |           |                 |              |         |
| Doxo_0nM vs. Doxo_80nM               | -1,078    | -10,44 to 8,281 | No           | ns      |
| Doxo_0nM vs. Doxo_160nM              | 0,942     | -8,417 to 10,30 | No           | ns      |
| <b>KU_5µM</b>                        |           |                 |              |         |
| Doxo_0nM vs. Doxo_80nM               | -7,348    | -16,71 to 2,011 | No           | ns      |
| Doxo_0nM vs. Doxo_160nM              | 1,574     | -7,786 to 10,93 | No           | ns      |
| <b>KU_10µM</b>                       |           |                 |              |         |
| Doxo_0nM vs. Doxo_80nM               | -4,606    | -13,97 to 4,754 | No           | ns      |
| Doxo_0nM vs. Doxo_160nM              | 3,538     | -5,822 to 12,90 | No           | ns      |

| Dunnett's multiple comparisons test# |           |                 |              |         |
|--------------------------------------|-----------|-----------------|--------------|---------|
| OPM2                                 |           |                 |              |         |
|                                      | Mean Diff | 95% CI of diff  | Significant? | Summary |
| KU_0µM vs. KU_5µM                    | 6,357     | -2,885 to 15,60 | No           | ns      |
| KU_0µM vs. KU_10µM                   | 16,69     | 7,447 to 25,93  | Yes          | ***     |
| <b>KU_0µM</b>                        |           |                 |              |         |
| Doxo_0nM vs. Doxo_80nM               | -1,849    | -21,04 to 17,34 | No           | ns      |
| Doxo_0nM vs. Doxo_160nM              | 34,15     | 14,96 to 53,34  | Yes          | ***     |
| <b>KU_5µM</b>                        |           |                 |              |         |
| Doxo_0nM vs. Doxo_80nM               | 1,208     | -17,98 to 20,40 | No           | ns      |
| Doxo_0nM vs. Doxo_160nM              | 29,47     | 10,28 to 48,66  | Yes          | **      |
| <b>KU_10µM</b>                       |           |                 |              |         |
| Doxo_0nM vs. Doxo_80nM               | 2,347     | -16,84 to 21,54 | No           | ns      |
| Doxo_0nM vs. Doxo_160nM              | 26,52     | 7,327 to 45,71  | Yes          | **      |

| Multiple t test##              |             |         |         |            |                  |         |    |
|--------------------------------|-------------|---------|---------|------------|------------------|---------|----|
| RPMI 8226                      |             |         |         |            |                  |         |    |
|                                | P value     | Mean1   | Mean2   | Difference | SE of difference | t ratio | df |
| <b>Doxo_0nM vs. Doxo_80nM</b>  |             |         |         |            |                  |         |    |
| KU_0µM                         | 1,40368E-05 | 100     | 73,9116 | 26,0884    | 4,42689          | 5,89316 | 18 |
| KU_5µM                         | 0,000133423 | 88,6919 | 67,2965 | 21,3954    | 4,42689          | 4,83305 | 18 |
| KU_10µM                        | 0,000299719 | 81,6641 | 61,9012 | 19,7629    | 4,42689          | 4,46428 | 18 |
| <b>Doxo_0nM vs. Doxo_160nM</b> |             |         |         |            |                  |         |    |
| KU_5µM                         | 0,0017728   | 88,6919 | 38,2382 | 50,4537    | 13,3061          | 3,79177 | 15 |
| KU_10µM                        | 0,00199331  | 81,6641 | 31,9729 | 49,6913    | 13,3061          | 3,73447 | 15 |
| KU_0µM                         | 0,00326152  | 100     | 53,5046 | 46,4954    | 13,3061          | 3,49429 | 15 |

| Multiple t test##                       |  |
|-----------------------------------------|--|
| LP1                                     |  |
| not significant for all the comparisons |  |

| Multiple t test##              |            |         |         |            |                  |         |    |
|--------------------------------|------------|---------|---------|------------|------------------|---------|----|
| OPM2                           |            |         |         |            |                  |         |    |
|                                | P value    | Mean1   | Mean2   | Difference | SE of difference | t ratio | df |
| <b>Doxo_0nM vs. Doxo_160nM</b> |            |         |         |            |                  |         |    |
| KU_0µM                         | 0,00413561 | 100     | 65,8528 | 34,1471    | 10,1069          | 3,37858 | 15 |
| KU_5µM                         | 0,0106545  | 94,321  | 64,8543 | 29,4667    | 10,1069          | 2,91549 | 15 |
| KU_10µM                        | 0,0191732  | 84,3977 | 57,8805 | 26,5173    | 10,1069          | 2,62367 | 15 |

| Dunnett's multiple comparisons test# |           |                 |              |         |
|--------------------------------------|-----------|-----------------|--------------|---------|
| U266                                 | Mean Diff | 95% CI of diff  | Significant? | Summary |
| KU_0µM vs. KU_5µM                    | 9,63      | 2,603 to 16,66  | Yes          | **      |
| KU_0µM vs. KU_10µM                   | 20,09     | 13,07 to 27,12  | Yes          | ****    |
| <b>KU_0µM</b>                        |           |                 |              |         |
| Doxo_0nM vs. Doxo_80nM               | 11        | -3,008 to 25,02 | No           | ns      |
| Doxo_0nM vs. Doxo_160nM              | 19,18     | 4,044 to 34,31  | Yes          | *       |
| <b>KU_5µM</b>                        |           |                 |              |         |
| Doxo_0nM vs. Doxo_80nM               | 17,5      | 3,489 to 31,51  | Yes          | *       |
| Doxo_0nM vs. Doxo_160nM              | 28,49     | 13,36 to 43,63  | Yes          | ***     |
| <b>KU_10µM</b>                       |           |                 |              |         |
| Doxo_0nM vs. Doxo_80nM               | 17,91     | 3,900 to 31,92  | Yes          | **      |
| Doxo_0nM vs. Doxo_160nM              | 30,36     | 15,22 to 45,49  | Yes          | ****    |

| Multiple t test#               |             |         |         |            |                  |         |    |
|--------------------------------|-------------|---------|---------|------------|------------------|---------|----|
| U266                           | P value     | Mean1   | Mean2   | Difference | SE of difference | t ratio | df |
| <b>Doxo_0nM vs. Doxo_80nM</b>  |             |         |         |            |                  |         |    |
| KU_10µM                        | 0,000515478 | 84,9152 | 67,0025 | 17,9127    | 4,24528          | 4,21944 | 18 |
| KU_5µM                         | 0,000639383 | 94,7972 | 77,296  | 17,5012    | 4,24528          | 4,12251 | 18 |
| KU_0µM                         | 0,0184037   | 100     | 88,996  | 11,004     | 4,24528          | 2,59207 | 18 |
| <b>Doxo_0nM vs. Doxo_160nM</b> |             |         |         |            |                  |         |    |
| KU_10µM                        | 0,000341644 | 84,9152 | 54,5598 | 30,3554    | 6,58781          | 4,60782 | 15 |
| KU_5µM                         | 0,000600489 | 94,7972 | 66,3031 | 28,4941    | 6,58781          | 4,32528 | 15 |
| KU_0µM                         | 0,0107441   | 100     | 80,8205 | 19,1795    | 6,58781          | 2,91136 | 15 |

**Supplementary Table 4**

**Comparison of the effects of VX-970 alone or in combination with KU-55933 in different cell lines using the GrapPad software**

# Statistical analysis was performed using 2 way ANOVA followed by Dunnett correction for multiple comparisons.

## Multiple t tests were performed and statistical significance determined using the Holm-Sidak method, with alpha=5.000% Only significant results are shown.

| Dunnett's multiple comparisons test# |           |                 |              |         |
|--------------------------------------|-----------|-----------------|--------------|---------|
| MM1.S                                | Mean Diff | 95% CI of diff  | Significant? | Summary |
| VX-970_0µM vs.VX-970_0.075µM         | 23,42     | 16,39 to 30,44  | Yes          | ****    |
| VX-970_0µM vs.VX-970_0.15µM          | 46,74     | 39,72 to 53,76  | Yes          | ****    |
| VX-970_0µM vs.VX-970_0.3µM           | 62,06     | 55,04 to 69,08  | Yes          | ****    |
| <b>VX-970_0µM</b>                    |           |                 |              |         |
| KU_0µM vs. KU_5µM                    | 15,86     | 4,461 to 27,26  | Yes          | **      |
| KU_0µM vs. KU_10µM                   | 51,33     | 39,93 to 62,72  | Yes          | ****    |
| <b>VX-970_0.075µM</b>                |           |                 |              |         |
| KU_0µM vs. KU_5µM                    | 22,57     | 11,17 to 33,97  | Yes          | ***     |
| KU_0µM vs. KU_10µM                   | 51,46     | 40,06 to 62,86  | Yes          | ****    |
| <b>VX-970_0.15µM</b>                 |           |                 |              |         |
| KU_0µM vs. KU_5µM                    | 19,34     | 7,942 to 30,74  | Yes          | **      |
| KU_0µM vs. KU_10µM                   | 34,7      | 23,30 to 46,10  | Yes          | ****    |
| <b>VX-970_0.3µM</b>                  |           |                 |              |         |
| KU_0µM vs. KU_5µM                    | 7,786     | -3,614 to 19,18 | No           | ns      |
| KU_0µM vs. KU_10µM                   | 14,88     | 3,479 to 26,28  | Yes          | *       |

| Dunnett's multiple comparisons test# |           |                  |              |         |
|--------------------------------------|-----------|------------------|--------------|---------|
| H929                                 | Mean Diff | 95% CI of diff.  | Significant? | Summary |
| VX-970_0µM vs.VX-970_0.075µM         | 11,15     | -0,6293 to 22,94 | No           | ns      |
| VX-970_0µM vs.VX-970_0.15µM          | 24,01     | 12,23 to 35,79   | Yes          | ****    |
| VX-970_0µM vs.VX-970_0.3µM           | 41,72     | 29,93 to 53,50   | Yes          | ****    |
| <b>VX-970_0µM</b>                    |           |                  |              |         |
| KU_0µM vs. KU_5µM                    | 5,69      | -13,44 to 24,82  | No           | ns      |
| KU_0µM vs. KU_10µM                   | 8,928     | -10,20 to 28,06  | No           | ns      |
| <b>VX-970_0.075µM</b>                |           |                  |              |         |
| KU_0µM vs. KU_5µM                    | 23,2      | 4,069 to 42,32   | Yes          | *       |
| KU_0µM vs. KU_10µM                   | 34,06     | 14,93 to 53,18   | Yes          | ***     |
| <b>VX-970_0.15µM</b>                 |           |                  |              |         |
| KU_0µM vs. KU_5µM                    | 30,15     | 11,02 to 49,27   | Yes          | **      |
| KU_0µM vs. KU_10µM                   | 44,9      | 25,78 to 64,03   | Yes          | ****    |
| <b>VX-970_0.3µM</b>                  |           |                  |              |         |
| KU_0µM vs. KU_5µM                    | 30,16     | 11,03 to 49,29   | Yes          | **      |
| KU_0µM vs. KU_10µM                   | 37,95     | 18,82 to 57,07   | Yes          | ***     |

| Multiple t test##         |             |         |         |            |                  |         |    |
|---------------------------|-------------|---------|---------|------------|------------------|---------|----|
| MM1.S                     | P value     | Mean1   | Mean2   | Difference | SE of difference | t ratio | df |
| <b>KU_0µM vs. KU_5µM</b>  |             |         |         |            |                  |         |    |
| VX-970_0.075µM            | 0,00109917  | 78,8644 | 56,2974 | 22,567     | 5,68434          | 3,97003 | 16 |
| VX-970_0.15µM             | 0,00364053  | 48,8805 | 29,5392 | 19,3413    | 5,68434          | 3,40255 | 16 |
| VX-970_0µM                | 0,0131052   | 100     | 84,1399 | 15,8601    | 5,68434          | 2,79014 | 16 |
| <b>KU_0µM vs. KU_10µM</b> |             |         |         |            |                  |         |    |
| VX-970_0.075µM            | 1,23172E-08 | 78,8644 | 27,4017 | 51,4627    | 4,86001          | 10,589  | 16 |
| VX-970_0µM                | 1,27893E-08 | 100     | 48,6743 | 51,3257    | 4,86001          | 10,5608 | 16 |
| VX-970_0.15µM             | 2,3469E-06  | 48,8805 | 14,18   | 34,7005    | 4,86001          | 7,14    | 16 |
| VX-970_0.3µM              | 0,00746105  | 23,1006 | 8,22289 | 14,8777    | 4,86001          | 3,06126 | 16 |

| Multiple t test##         |             |         |         |            |                  |         |    |
|---------------------------|-------------|---------|---------|------------|------------------|---------|----|
| H929                      | P value     | Mean1   | Mean2   | Difference | SE of difference | t ratio | df |
| <b>KU_0µM vs. KU_5µM</b>  |             |         |         |            |                  |         |    |
| VX-970_0.3µM              | 0,00121997  | 76,1121 | 45,9524 | 30,1597    | 7,69282          | 3,92049 | 16 |
| VX-970_0.15µM             | 0,00122461  | 96,1352 | 65,9894 | 30,1458    | 7,69282          | 3,91869 | 16 |
| VX-970_0.075µM            | 0,00821279  | 103,059 | 79,8623 | 23,1963    | 7,69282          | 3,01532 | 16 |
| <b>KU_0µM vs. KU_10µM</b> |             |         |         |            |                  |         |    |
| VX-970_0.15µM             | 1,03771E-05 | 96,1352 | 51,231  | 44,9042    | 7,11635          | 6,31    | 16 |
| VX-970_0.3µM              | 6,74133E-05 | 76,1121 | 38,167  | 37,9451    | 7,11635          | 5,33211 | 16 |
| VX-970_0.075µM            | 0,000202062 | 103,059 | 69,0006 | 34,058     | 7,11635          | 4,78588 | 16 |



| Dunnett's multiple comparisons test# |           |                  |              |         |
|--------------------------------------|-----------|------------------|--------------|---------|
| <b>KMS20</b>                         | Mean Diff | 95% CI of diff.  | Significant? | Summary |
| VX-970_0µM vs.VX-970_0.075µM         | 3,806     | -9,151 to 16,76  | No           | ns      |
| VX-970_0µM vs.VX-970_0.15µM          | 19,38     | 6,419 to 32,33   | Yes          | **      |
| VX-970_0µM vs.VX-970_0.3µM           | 46,29     | 33,33 to 59,24   | Yes          | ****    |
| <b>VX-970_0µM</b>                    |           |                  |              |         |
| KU_0µM vs. KU_5µM                    | 11,63     | -9,401 to 32,66  | No           | ns      |
| KU_0µM vs. KU_10µM                   | 26,66     | 5,632 to 47,70   | Yes          | *       |
| <b>VX-970_0.075µM</b>                |           |                  |              |         |
| KU_0µM vs. KU_5µM                    | 16,56     | -4,477 to 37,59  | No           | ns      |
| KU_0µM vs. KU_10µM                   | 28,07     | 7,037 to 49,10   | Yes          | **      |
| <b>VX-970_0.15µM</b>                 |           |                  |              |         |
| KU_0µM vs. KU_5µM                    | 21,03     | ,0007391 to 42,0 | Yes          | *       |
| KU_0µM vs. KU_10µM                   | 31,87     | 10,84 to 52,90   | Yes          | **      |
| <b>VX-970_0.3µM</b>                  |           |                  |              |         |
| KU_0µM vs. KU_5µM                    | 14        | -7,035 to 35,03  | No           | ns      |
| KU_0µM vs. KU_10µM                   | 19,86     | -1,168 to 40,90  | No           | ns      |

| Dunnett's multiple comparisons test# |           |                 |              |         |
|--------------------------------------|-----------|-----------------|--------------|---------|
| <b>RPMI 8226</b>                     | Mean Diff | 95% CI of diff. | Significant? | Summary |
| VX-970_0µM vs.VX-970_0.075µM         | 29,5      | 14,54 to 44,46  | Yes          | ***     |
| VX-970_0µM vs.VX-970_0.15µM          | 60,72     | 45,76 to 75,68  | Yes          | ****    |
| VX-970_0µM vs.VX-970_0.3µM           | 83,3      | 68,34 to 98,26  | Yes          | ****    |
| <b>VX-970_0µM</b>                    |           |                 |              |         |
| KU_0µM vs. KU_5µM                    | 2,827     | -21,46 to 27,12 | No           | ns      |
| KU_0µM vs. KU_10µM                   | 8,155     | -16,13 to 32,44 | No           | ns      |
| <b>VX-970_0.075µM</b>                |           |                 |              |         |
| KU_0µM vs. KU_5µM                    | 28,14     | 3,850 to 52,43  | Yes          | *       |
| KU_0µM vs. KU_10µM                   | 43,3      | 19,01 to 67,59  | Yes          | ***     |
| <b>VX-970_0.15µM</b>                 |           |                 |              |         |
| KU_0µM vs. KU_5µM                    | 36,32     | 12,03 to 60,61  | Yes          | **      |
| KU_0µM vs. KU_10µM                   | 44,53     | 20,24 to 68,82  | Yes          | ***     |
| <b>VX-970_0.3µM</b>                  |           |                 |              |         |
| KU_0µM vs. KU_5µM                    | 14,29     | -9,998 to 38,58 | No           | ns      |
| KU_0µM vs. KU_10µM                   | 13,84     | -10,45 to 38,13 | No           | ns      |

| Multiple t test#          |             |         |         |            |                  |         |    |
|---------------------------|-------------|---------|---------|------------|------------------|---------|----|
| <b>KMS20</b>              | P value     | Mean1   | Mean2   | Difference | SE of difference | t ratio | df |
| <b>KU_0µM vs. KU_10µM</b> |             |         |         |            |                  |         |    |
| VX-970_0.15µM             | 2,75347E-05 | 85,4936 | 53,6229 | 31,8707    | 5,50277          | 5,79176 | 16 |
| VX-970_0.075µM            | 0,00010681  | 98,3041 | 70,2345 | 28,0696    | 5,50277          | 5,10101 | 16 |
| VX-970_0µM                | 0,000178888 | 100     | 73,3354 | 26,6646    | 5,50277          | 4,84568 | 16 |
| VX-970_0.3µM              | 0,00234951  | 52,2362 | 32,3717 | 19,8645    | 5,50277          | 3,60991 | 16 |

| Multiple t test#          |             |         |         |            |                  |         |    |
|---------------------------|-------------|---------|---------|------------|------------------|---------|----|
| <b>RPMI 8226</b>          | P value     | Mean1   | Mean2   | Difference | SE of difference | t ratio | df |
| <b>KU_0µM vs. KU_5µM</b>  |             |         |         |            |                  |         |    |
| VX-970_0.15µM             | 0,00368704  | 62,5704 | 26,2494 | 36,321     | 10,6935          | 3,39653 | 16 |
| <b>KU_0µM vs. KU_10µM</b> |             |         |         |            |                  |         |    |
| VX-970_0.15µM             | 0,000467293 | 62,5704 | 18,0379 | 44,5325    | 10,1698          | 4,37889 | 16 |
| VX-970_0.075µM            | 0,000601258 | 90,6493 | 47,3478 | 43,3015    | 10,1698          | 4,25785 | 16 |

| Dunnnett's multiple comparisons test# |           |                   |              |         |
|---------------------------------------|-----------|-------------------|--------------|---------|
| LP1                                   | Mean Diff | 95% CI of diff    | Significant? | Summary |
| VX-970_0µM vs.VX-970_0.075µM          | 5,185     | -6,953 to 17,32   | No           | ns      |
| VX-970_0µM vs.VX-970_0.15µM           | 17,99     | 5,849 to 30,12    | Yes          | **      |
| VX-970_0µM vs.VX-970_0.3µM            | 33,36     | 21,22 to 45,50    | Yes          | ****    |
| <b>VX-970_0µM</b>                     |           |                   |              |         |
| KU_0µM vs. KU_5µM                     | 16,56     | -3,145 to 36,26   | No           | ns      |
| KU_0µM vs. KU_10µM                    | 28,77     | 9,067 to 48,48    | Yes          | **      |
| <b>VX-970_0.075µM</b>                 |           |                   |              |         |
| KU_0µM vs. KU_5µM                     | 19,87     | 0,1675 to 39,58   | Yes          | *       |
| KU_0µM vs. KU_10µM                    | 30,24     | 10,53 to 49,94    | Yes          | **      |
| <b>VX-970_0.15µM</b>                  |           |                   |              |         |
| KU_0µM vs. KU_5µM                     | 22,36     | 2,658 to 42,07    | Yes          | *       |
| KU_0µM vs. KU_10µM                    | 27,69     | 7,986 to 47,39    | Yes          | **      |
| <b>VX-970_0.3µM</b>                   |           |                   |              |         |
| KU_0µM vs. KU_5µM                     | 18,44     | -1,267 to 38,14   | No           | ns      |
| KU_0µM vs. KU_10µM                    | 19,68     | -0,02012 to 39,35 | No           | ns      |

| Dunnnett's multiple comparisons test# |           |                 |              |         |
|---------------------------------------|-----------|-----------------|--------------|---------|
| OPM2                                  | Mean Diff | 95% CI of diff  | Significant? | Summary |
| VX-970_0µM vs.VX-970_0.075µM          | 6,997     | -12,50 to 26,49 | No           | ns      |
| VX-970_0µM vs.VX-970_0.15µM           | 23,89     | 4,394 to 43,38  | Yes          | *       |
| VX-970_0µM vs.VX-970_0.3µM            | 57,69     | 38,20 to 77,18  | Yes          | ****    |
| <b>VX-970_0µM</b>                     |           |                 |              |         |
| KU_0µM vs. KU_5µM                     | 1,79      | -29,85 to 33,43 | No           | ns      |
| KU_0µM vs. KU_10µM                    | 6,581     | -25,06 to 38,22 | No           | ns      |
| <b>VX-970_0.075µM</b>                 |           |                 |              |         |
| KU_0µM vs. KU_5µM                     | 11,28     | -20,36 to 42,92 | No           | ns      |
| KU_0µM vs. KU_10µM                    | 20,21     | -11,43 to 51,85 | No           | ns      |
| <b>VX-970_0.15µM</b>                  |           |                 |              |         |
| KU_0µM vs. KU_5µM                     | 20,07     | -11,57 to 51,72 | No           | ns      |
| KU_0µM vs. KU_10µM                    | 26,99     | -4,650 to 58,64 | No           | ns      |
| <b>VX-970_0.3µM</b>                   |           |                 |              |         |
| KU_0µM vs. KU_5µM                     | 23,75     | -7,896 to 55,39 | No           | ns      |
| KU_0µM vs. KU_10µM                    | 25        | -6,638 to 56,65 | No           | ns      |

| Multiple t test##         |            |         |         |            |                  |         |    |
|---------------------------|------------|---------|---------|------------|------------------|---------|----|
| LP1                       | P value    | Mean1   | Mean2   | Difference | SE of difference | t ratio | df |
| <b>KU_0µM vs. KU_5µM</b>  |            |         |         |            |                  |         |    |
| VX-970_0.15µM             | 0,0117544  | 83,5873 | 61,2251 | 22,3623    | 7,86623          | 2,84282 | 16 |
| <b>KU_0µM vs. KU_10µM</b> |            |         |         |            |                  |         |    |
| VX-970_0.075µM            | 0,00140167 | 96,4083 | 66,1703 | 30,238     | 7,84466          | 3,8546  | 16 |
| VX-970_0µM                | 0,00207976 | 100     | 71,2286 | 28,7714    | 7,84466          | 3,66764 | 16 |
| VX-970_0.15µM             | 0,00278246 | 83,5873 | 55,8969 | 27,6905    | 7,84466          | 3,52985 | 16 |
| VX-970_0.3µM              | 0,0232386  | 64,2354 | 44,5514 | 19,684     | 7,84466          | 2,50923 | 16 |

| Multiple t test##                       |  |
|-----------------------------------------|--|
| OPM2                                    |  |
| not significant for all the comparisons |  |

| Dunnett's multiple comparisons test# |           |                  |              |         |
|--------------------------------------|-----------|------------------|--------------|---------|
| U266                                 | Mean Diff | 95% CI of diff   | Significant? | Summary |
| VX-970_0µM vs.VX-970_0.075µM         | 8,569     | 1,275 to 15,86   | Yes          | *       |
| VX-970_0µM vs.VX-970_0.15µM          | 23,16     | 15,86 to 30,45   | Yes          | ****    |
| VX-970_0µM vs.VX-970_0.3µM           | 45,51     | 38,22 to 52,80   | Yes          | ****    |
| <b>VX-970_0µM</b>                    |           |                  |              |         |
| KU_0µM vs. KU_5µM                    | 3,233     | -8,607 to 15,07  | No           | ns      |
| KU_0µM vs. KU_10µM                   | 10,9      | -0,9412 to 22,74 | No           | ns      |
| <b>VX-970_0.075µM</b>                |           |                  |              |         |
| KU_0µM vs. KU_5µM                    | 7,773     | -4,068 to 19,61  | No           | ns      |
| KU_0µM vs. KU_10µM                   | 16,53     | 4,688 to 28,37   | Yes          | **      |
| <b>VX-970_0.15µM</b>                 |           |                  |              |         |
| KU_0µM vs. KU_5µM                    | 16,41     | 4,566 to 28,25   | Yes          | **      |
| KU_0µM vs. KU_10µM                   | 25,98     | 14,14 to 37,82   | Yes          | ****    |
| <b>VX-970_0.3µM</b>                  |           |                  |              |         |
| KU_0µM vs. KU_5µM                    | 14,66     | 2,816 to 26,50   | Yes          | *       |
| KU_0µM vs. KU_10µM                   | 16,05     | 4,214 to 27,89   | Yes          | **      |

| Multiple t test#          |             |         |         |            |                  |         |    |
|---------------------------|-------------|---------|---------|------------|------------------|---------|----|
| U266                      | P value     | Mean1   | Mean2   | Difference | SE of difference | t ratio | df |
| <b>KU_0µM vs. KU_5µM</b>  |             |         |         |            |                  |         |    |
| VX-970_0.15µM             | 0,00129254  | 86,2635 | 69,857  | 16,4066    | 4,21432          | 3,89306 | 16 |
| VX-970_0.3µM              | 0,00310658  | 60,0163 | 45,3602 | 14,6561    | 4,21432          | 3,47768 | 16 |
| <b>KU_0µM vs. KU_10µM</b> |             |         |         |            |                  |         |    |
| VX-970_0.15µM             | 0,000224758 | 86,2635 | 60,2818 | 25,9818    | 5,4886           | 4,73378 | 16 |
| VX-970_0.075µM            | 0,00827946  | 94,8205 | 78,2919 | 16,5286    | 5,4886           | 3,01144 | 16 |
| VX-970_0.3µM              | 0,00991086  | 60,0163 | 43,9616 | 16,0546    | 5,4886           | 2,92509 | 16 |
