# Supplementary material for: ATR addiction in multiple myeloma: synthetic lethal approaches exploiting established therapies
Source: PubMed Central journal article supplement — Haematologica. 2019 Nov 14;105(10):2448–56. doi: 10.3324/haematol.2018.215210 (PMC7556682; doi:10.3324/haematol.2018.215210), 2019-11-14
Supplement: 2018_215210-DisclosuresContributions.pdf [file 2018_215210-DisclosuresContributions.pdf]

Haematologica  
HAEMATOL/2018/215210  
Version 4

ATR addiction in multiple myeloma: synthetic lethal approaches  
exploiting established therapies

Oronza A. Botrugno, Silvia Bianchessi, Desirée Zambroni, Michela Frenquelli, Daniela Belloni, Lucia Bongiovanni, Stefania Girlanda, Simona Di Terlizzi, Marina Ferrarini, Elisabetta Ferrero, Maurilio Ponzoni, Magda Marcatti, and Giovanni Tonon

Disclosures: Funding for this research was provided by Associazione Italiana per la Ricerca sul Cancro (AIRC; Investigator Grants and Special Program Molecular Clinical Oncology, 5 per mille no. 9965 to G.T.). No financial disclosures to report, nor patents or copyrights.

Contributions: O.A.B. designed the study, performed experiments, analyzed data and wrote the manuscript. S.B and M.F. helped with in vivo experiments. D.Z. performed high-throughput microscopy experiments. D.B. M.F. and E.F. performed 3D experiments. L.B and M.P. performed immunohistochemistry on primary samples. S.G. and M.M provided primary samples and helpful discussion. S.D.T helped with FACS analysis. GT designed the study, analyzed data, and wrote the manuscript. All the Authors approved the manuscript.
